# 1 Patterning Fluid Shear Stress Landscapes with 2 Multiphoton Inner Laser Lithography (MILL) for 3 Live Cell Adhesion and Translocation

4 Yean J. Lim<sup>a,b</sup>, Junxiang Zhang<sup>a,b</sup>, Hanqi Lin<sup>a,b</sup>, Tienan Xu<sup>a,b</sup>, Yongxiao Li<sup>a,b</sup>, Zhiduo Zhang<sup>a,b</sup>, Sarah  
5 M. Hicks<sup>a</sup>, Ivan Chudinov<sup>c,d</sup>, Dmitry Nechipurenko<sup>c</sup>, Elizabeth E. Gardiner<sup>a</sup>, Woei M. Lee<sup>a,b</sup>

6 <sup>a</sup> Division of Genomic Sciences and Cancer, The John Curtin School of Medical Research, The  
7 Australian National University, Canberra, ACT 2601, Australia

8  
9 <sup>b</sup> ACRF INCiTe Centre - ANU Node, The John Curtin School of Medical Research, The Australian  
10 National University, Canberra, ACT 2601, Australia

11  
12 <sup>c</sup> Faculty of Physics, Lomonosov Moscow State University, Moscow, Russia

13 <sup>d</sup> Moscow Institute of Physics and Technology, Moscow, Russia

14 **Abstract:** Current 3D microfluidic fabrication methods require hours and specialized equipment to  
15 fabricate microstructures in a single channel so as to recapitulate mixed (homogenous and  
16 heterogeneous) *in vivo* fluid flow. Inspired by the ancient art form of inside painting, we developed a  
17 technique for 3D fabrication of micro-patterned flow channels and mixed *in vivo* fluid flow in a matter  
18 of minutes. We termed this technique Multiphoton Inner Laser Lithography (*MILL*). We further showed  
19 that *MILL* is compatible with both flat and curved channel shapes. *MILL* recapitulated *in vivo* tissue  
20 topology and 3D fluid flow of the tissue microenvironment, all of which are vital for understanding of  
21 how extracellular fluid flow regulates cell function. Cells in *MILL* capillary tubes response to a variety  
22 of *in vivo*-like laminar flow patterns (homogenous and heterogeneous). Live cells were observed to  
23 organize, translocate and adhere along different fluid shear landscapes (0 – 81 dynes/cm<sup>2</sup>) in real time.  
24 Parallel strips of *MILL* channels were assembled for platelet function tests (~2000 microthrombi per  
25 test). The *MILL* technique heralds a new paradigm where dynamics of *in vivo* fluid flow can be readily  
26 reproduced in minutes on a standard multiphoton imaging microscope and benefit preclinical screening  
27 of drug pharmacokinetics.

28

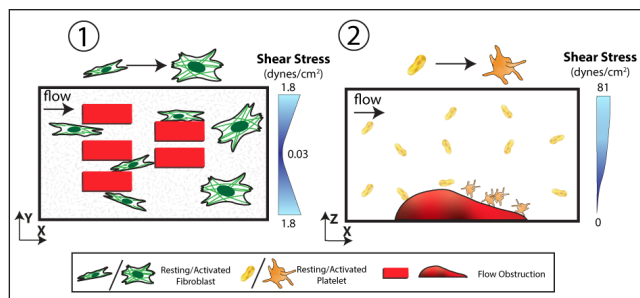

29

30

31

32

33

34

35

36

37

38

39

40

41

42

## Significant points

- *MILL* surpasses current microfluidic fabrication speeds with high writing resolution.
- *MILL* recapitulates the diverse degrees of laminar flow of *in vivo* tissue.
- *MILL* is conducted using a standard multiphoton imaging systems.
- *MILL* demonstrates fibroblast translocation in response to mixed shear landscapes.
- *MILL* captures platelet organization and motility under mixed laminar flow conditions.

*Keywords: microfluidics, lithography, fluid shear, fibroblast, thrombus*

## 1 Introduction

2           Complex 3D microstructures fabricated in a single microfluidic channel are necessary to  
3 reproduce mixture of fluid shear conditions present in *in vivo* microenvironments. Common fabrication  
4 methods to create microstructure patterning in a single flow channel either uses soft lithography (Figure  
5 1 A) i)) or fused deposition (Figure 1 A) ii)). Both of the techniques requires multiple stepwise  
6 deposition of curable resin or polydimethylsiloxane (PDMS) respectively, onto open two-dimensional  
7 surfaces<sup>1</sup> that often require hours of preparation and specialized instruments. Aside from flexibility in  
8 2D micropatterning, high optical transparency (>90%) and surface functionalization are essential in  
9 molecular and cellular assays<sup>2</sup> for genomics, proteomics and phenotypic quantification<sup>3</sup>. There are  
10 significant fabrication hurdles to develop 2D soft lithography techniques<sup>4</sup> for fully enclosed 3D  
11 surfaces that has high optical transparency. (1) Soft lithography processes are optimized for open and  
12 exposed flat surfaces that require passivating steps<sup>5</sup>, (2) soft lithography requires specialized equipment  
13 (UV lamp, thermal heating oven, desiccator, plasma cleaner)<sup>6</sup>, (3) PDMS variably absorbs  
14 different hydrophobic molecules and so confound studies involving the delivery of small molecules into  
15 cells<sup>7</sup>. Taken together, standard soft lithography involves hours of labor-intensive, repeated set of steps  
16 (Figure 1A)<sup>8</sup> to achieve 3D microstructures. To advance cell biology questions incorporating the *in*  
17 *vivo* flow environment, we propose to develop a full 3D lithography methods<sup>9,10</sup> that is directly  
18 compatible with enclosed 3D flow channels<sup>11</sup>. The goal of direct 3D modification in an enclosed flow  
19 channel is to mimic *in vivo* flow conditions in the microenvironment. In the tissue microenvironment,  
20 the 3D surface roughness influences the trajectory of fluid flow<sup>12,13</sup> that is important in platelet  
21 production<sup>14</sup>, transmural nutrient delivery<sup>15</sup> atherosclerosis<sup>13</sup> and tumor metastasis<sup>16</sup>.

22           Flow in the body is commonly described as laminar, which exhibits a parabolic profile across  
23 a uniform channel and is often referred to a single Reynolds number ( $Re < 2000$ ) and assigned a single  
24 shear rate<sup>14</sup>. Hence, ‘laminar’ describes a physical parameter that does not fully encompass *in vivo* flow  
25 complexity<sup>12</sup>. *In vivo* flow through living tissue encounters multiple barriers (e.g. surface protrusions,  
26 cells and extracellular matrix) that alter the parabolic flow, creating different degrees of laminar flow  
27 in the interstitium and blood vessels. Here, we propose two types of laminar flow regimes: (1) flow  
28 landscapes with fixed laminar shear referred as ‘homogeneous flow’ and (2) flow landscapes with  
29 mixed laminar shear referred as ‘heterogeneous flow’. *In vivo* fluid shear varies from 0 – 70 dynes/cm<sup>2</sup>  
30 and is responsible for triggering intracellular signaling, transduction<sup>17</sup> and cell migration<sup>18</sup> and are  
31 important in maintaining the homeostasis of tissue niches<sup>19</sup>, initiating tissue repair<sup>20</sup>, bone development  
32<sup>21</sup>, cancer metastasis<sup>16,22</sup>, angiogenesis<sup>23</sup>, regulating cardiac fibrosis and impacts on thrombosis<sup>24</sup>.  
33 Despite this, the majority of tissue-on-chip<sup>25</sup> or organ-on-chip<sup>26</sup> systems are generally designed with

1 homogeneous fluid shear stress (FSS) in soft lithographic hollow channels lined by a single layer of  
2 cultured cells or tissue. We argue that the oversimplification of flow is primarily because of the limited  
3 direct 3D flow channel fabrication methods that fail to adequately reflect *in vivo* fluid motion<sup>12,13,23</sup>.

4 In this study, we describe a direct 3D fabrication method, Multiphoton Inner Laser Lithography  
5 (*MILL*), that modifies glass capillaries<sup>27,28</sup> for use in a microfluidic flow assay within 1 hour (Figure  
6 1A, iii) with micrometer resolution. In doing so, we, for the first time, gain access to *in vivo*, 3D fluid  
7 flow landscapes that exhibits a mixture of heterogeneous flow. *MILL* is inspired by the art form of inside  
8 painting<sup>29</sup>, that uses multiphoton absorption to sculpt the inner surfaces of transparent glass capillaries  
9 using doped photocurable ultraviolet resins<sup>30</sup>. More importantly, we built *MILL* using a standard  
10 multiphoton imaging system without the need for specialized 3D laser photolithography platforms<sup>31</sup>.  
11 We further showed that adaptive optics *MILL* removes spatial optical aberrations in curved thick  
12 cylindrical glass capillary tubes. For *MILL* capillary assays to match with traditional microfluidics, we  
13 also describe a rapid hermetical sealing protocol using standard UV adhesive. The UV assisted bonding  
14 protocol allows standard silicone fluidic tubes to connect to *MILL* glass capillary tubes and establish a  
15 robust fluidic flow assay. A soft silicone capillary gripper is developed to hold multiple channels for  
16 high throughput measurements.

17 With *MILL* capillaries, we recapitulate the dynamics of cell-tissue interactions induced by  
18 homogeneous and heterogeneous fluid shear in the interstitium and vasculature. Cells adhered by  
19 integrin binding and clustering on three-dimensional extracellular matrix (ECM) and initiated  
20 cytoskeletal reorganization to alter their physical shape<sup>32</sup> and migrate along mechanical and chemical  
21 cues. Heterogenous FSS serves as a distinctive mechanical cue (separated from material stiffness),  
22 which has previously been observed to stimulate migratory protomyofibroblast phenotype after  
23 integrin  $\beta 1$  activation on collagen fibrils<sup>33-35</sup>. *In vivo* results have shown that fibroblast cells are capable  
24 of sensing homogenous shear gradients<sup>36</sup>. However, little is known about how fibroblast cells  
25 proliferate and differentiate into protomyofibroblasts in irregular interstitial flow conditions. We first  
26 established a long-term (12 hrs) live cell imaging protocol using regular capillary tubes that pinpointed  
27 the emergence of migratory phenotype resembling protomyofibroblasts<sup>37,38</sup> under interstitial fluid flow  
28 ( $< 1 \text{ dyn/cm}^2$ ) first observed by Ng *et al*<sup>35</sup>. Due to lack of molecular markers in protomyofibroblasts  
29 (low  $\alpha$ -smooth muscle actin (SMA))<sup>37</sup>, we focused on migratory responses of fibroblast and alignment  
30 of actin cytoskeleton stress fibers<sup>39</sup>. Using the same interstitial flow rates, we explored heterogeneous  
31 fluid flow conditions that mimic tissue microarchitecture or niche environments<sup>19,40</sup> and the relationship  
32 with fibroblast activation. Using *MILL*, we further explored how adherent fibroblast cells sense and  
33 respond to shear gradients<sup>41</sup>.

1 Existing fluid shear assays are often conducted on rectangular flow channels that do not  
2 faithfully replicate the circular geometry in blood vessels<sup>42</sup>. We applied *MILL* to incorporate structures  
3 into cylindrical capillary tubes to mimic the appropriate fluid dynamics found in the vasculature<sup>43</sup>.  
4 Using adaptive optics, we showed that a *MILL* cylindrical tube can take on complex geometries<sup>44</sup>. To  
5 simulate the heterogeneous FSS in cylindrical flow channels, we modelled and designed asymmetrical  
6 microstructures<sup>45</sup> that mimic small and large stenoses. Since *MILL* capillary tubes are thin, optically  
7 transparent, and smooth, they are highly suited to perform a range of cellular imaging (holographic,  
8 confocal, multiphoton and total internal reflectance microscopy) to visualize and quantify several  
9 multiple biological markers to assess underlying biological functions.

## 11 Results

### 12 *Fibroblast proliferation requires integrin engagement and is directly modulated by fluid shear stress*

13  
14 While fibroblasts can proliferate through direct sensing of varying matrix stiffness (1 to 5 kPa  
15<sup>46</sup>) and ligand concentrations, their ability to respond to FSS has so far only been inferred<sup>33,35,38,39</sup>. To  
16 determine the extent to what extent FSS would influence cell translocation, we subjected a murine  
17 fibroblast L929 cell line to different levels of laminar fluid shear from 0 to 3.5 dynes/cm<sup>2</sup> and that  
18 mimics fluid shear stress found in interstitial spaces<sup>35</sup>. We then investigated the influence of ligand  
19 binding on cell shape and migratory behavior of fibroblast<sup>37-39</sup>, where a receptor-ligand adhesion (e.g.  
20 integrin-collagen binding) supports increased cell resistance to shear forces over non-specific (e.g.  
21 surface charge) interactions. In our experiments, the substrate coating thickness (Poly-L-Lysine, PLL  
22 and collagen fibrils) is a third of the cell thickness, which confers limited force for mechanotransduction.  
23 Cells adhering onto PLL or collagen fibrils were exposed to 12 hours of either continuous FSS exposure  
24 in transparent capillary tubes or no shear on a coated glass bottom culture dish (see Methods). A portion  
25 of cell adhesion could also be accounted by the surface adsorption of fibronectin derived from cell  
26 culture serum in both conditions. We quantified migratory patterns and cell shape (determined by cell  
27 ellipticity) over 12 hours at 10 second intervals using label-free quantitative phase microscopy (QPM)  
28<sup>47</sup> (see Methods), which provides high resolution volumetric morphological profiling. Cell ellipticity  
29 (Figure 2 B) i)) quantifies the transition of a cell state from resting to adhesive<sup>48</sup>. Higher ellipticity  
30 values indicate proadhesive cells that are more engaged with ligand-coated surfaces. Under all  
31 conditions of shear stress, immobilized collagen appeared to elicit stronger adhesiveness than PLL. The  
32 results also suggest that adhesion dynamics can be directly modulated by homogenous FSS alone and  
33 is independent of the type of ligand coating. At a shear stress of 1.7 and 2.6 dynes/cm<sup>2</sup>, cell adhesiveness  
34 was observed to be low with mean ellipticity of 0.3 and 0.5 for PLL and collagen coatings, respectively

1 (Figure 2 B) ii)). On PLL, cell adhesiveness is highest at 0.9 dynes/cm<sup>2</sup> with peak mean ellipticity of  
2 0.65. Conversely, cell adhesion on collagen remained high with a peak mean ellipticity of 0.8 at 0.9  
3 dynes/cm<sup>2</sup>. We observed mean ellipticity reached 0.75 at 3.5 dynes/cm<sup>2</sup> on collagen. Single cell tracking  
4 showed that 3.5 dynes/cm<sup>2</sup> FSS led to a rapid (<20 sec) expansion of cell perimeter followed by a loss  
5 of motion, which we ascribed to cell rupture. Importantly, cell rupture was observed when collagen was  
6 the ligand but not PLL (Supplementary Figure S1). In fact, cells adherent on PLL did not rupture over  
7 the full 12 hrs. Based on the results in Figure 2 B) ii), integrin adhesion to collagen under FSS<sup>35</sup> resulted  
8 in 2- to 3-fold higher surface adhesion when compared with PLL. After cells have adhered to the ligand  
9 surface, we tracked the mobility of cells. Under FSS, we repeatedly observed formation of cell  
10 aggregates with either ligand coatings. Hence, automated tracking of cell clusters was performed using  
11 Trackmate (ImageJ). The results in Figure 2B) iii) shows that cell mobility reached a maximum speed  
12 of 9 μm/hr on collagen coating under shear stress of 0.9 dynes/cm<sup>2</sup> that is around twice the speed when  
13 compared with PLL coating. This increase was abrogated at higher FSS (1.7 dynes/cm<sup>2</sup>).

14 Figure 2C) i) to iv) shows QPM images from a time lapse recording taken at 2-hour intervals.  
15 On PLL coating without FSS, most cells (> 80%, n = 37) remained stationary, with a small population  
16 that spread and migrated (as shown Figure 2 C) i)), often remaining separated. However, cells exposed  
17 to 0.9 dynes/cm<sup>2</sup> shear stress would spontaneously cluster into multiple discrete aggregates, indicating  
18 that intercellular adhesion increased under homogenous FSS. Within each cell aggregate, as shown in  
19 Figure 2C) ii), we observed that individual cells would ‘roll’ and organize in the direction of flow.  
20 Without flow, cells adhering on collagen-coated capillaries extends membrane protrusions (filopodial)  
21 matching half its own cell diameter over several hours (Figure 2 C) iii)). In contrast, as shown in Figure  
22 2 C) iv) and Supplementary Video M1, the first hour of shear exposure (0.9 dynes/cm<sup>2</sup>) to collagen-  
23 adherent cells stimulated an increase in motility of up to 9 μm/hr. Together the data indicates shear  
24 stress of 0.9 dynes/cm<sup>2</sup> stimulates maximum adhesion with the highest rate of mobility, a biophysical  
25 marker of migratory fibroblast types<sup>20</sup>. 0.9 dynes/cm<sup>2</sup> are fluid shear reported in interstitial fluid<sup>35</sup> and  
26 lymph nodes<sup>49</sup>, where fibroblasts reside. The presence of collagen and shear are both required to induce  
27 a phenotype consistent to proto-myofibroblast formation.

28 As shown in Figure 2 A), changes to cell shape require actin polymerisation to generate tense  
29 actin fibers. We quantified actin fiber alignment using F-actin labeling (phalloidin) after exposing cells  
30 to fluid shear stress for 12 hrs. We also compared cells that were not exposed to any flow gradient to  
31 quantify the influence of fluid shear. On PLL coating, over 80% of the cells (n = 6) retained a spherical  
32 shape and actin fibers were randomly arranged (*i.e.*, disordered), shown in Figure 2 D), indicating  
33 minimal cytoskeletal rearrangement. Cells adhering to PLL coating that were exposed to homogenous

1 FSS of 0.9 dynes/cm<sup>2</sup> would generate “fin-like” lamellipodium protrusions whilst remaining weakly  
2 aligned, as shown in Figure 2 D) ii). This is consistent with time lapse imaging results from cell shape  
3 and motility shown in Figure 2 B) ii) and iii). PLL, in general, shows lower amount of cell adhesiveness  
4 and cytoskeleton rearrangements.

5 On the other hand, cells adhering onto collagen coated surfaces displayed extended protrusions  
6 driven by actin polymerization as shown in Figure 2 D) iii) through integrin engagement<sup>20</sup>. However,  
7 under shear stress, membrane protrusions can span over 20 – 30 μm long, as shown Figure 2 D) iv).  
8 This result indicates that even at low FSS, actin polymerization can be modulated significantly. Next,  
9 we quantified the degree of actin alignment along a chosen axis using morphometric analysis program  
10 developed by Lickert *et al*<sup>48</sup>. In our case, we measure the actin alignment along the flow axis (parallel)  
11 as shown in Figure 2 D) v) and vi). A rainbow color code is assigned to the alignment direction. As  
12 shown in Figure 2 D) v) and vi), the cells on both PLL and collagen coating were polarized to form  
13 actin fibers that align along the flow axis. Actin fibers aligned in parallel to the flow axis will be assigned  
14 value close to unity. By examining single cells (n=4) that are not clustered, we observed a two-fold  
15 higher alignment of actin to fluid flow on collagen fibers (Figure 2 D) vii),  $P < 0.001$ ), but no significant  
16 increase in in alignment to PLL. Under both absence or presence of fluid shear, we observed ~2-fold  
17 increased alignment in cells on collagen compared to PLL coating ( $P < 0.01$ ). From these results – cell  
18 shape, motility, and actin alignment along flow, fibroblast differentiation and translocation are both  
19 regulated by integrin engagement and FSS. Additional data on cell viability and time lapse results  
20 (Figure 2C) are available in Supplementary Figure S1 and Supplementary Video M1, respectively.

21  
22 *Homogeneous and heterogeneous fluid flow modulates cell motility and actin bundling differently*  
23

24 In living organs, fluid flow in tissue matrix and microvasculature are mostly heterogenous.  
25 Cell-cell interactions are therefore subject to heterogenous shear stresses that can alter signal  
26 transductions by a variety of receptor-ligand systems. In contrast to the homogenous FSS, here we asked  
27 how heterogenous shear stress modulates fibroblast activation and motility. Based on our findings in  
28 Figure 2, we expected heterogeneous shear to form groups of fibroblasts with different levels of  
29 adhesion. To investigate this, we need to design and pattern three dimensional physical obstructions  
30 within microfluidic channels (Figure 1 B) and 2). To test the throughput of *MILL*, we generated a 30  
31 μm-thick herringbone structure used to generate turbulent flow for mixing solutions<sup>50</sup>. The structure  
32 consists of 9 herringbones that span the entire width and 1 mm along the length of a square glass  
33 capillary (lumen width and height: 200 μm) (Figure 1 B)), where one herringbone took ~9 minutes to  
34 complete, demonstrating that *MILL* achieves millimeter scale structures within 1.5 hours.

1            Having proven the throughput of *MILL*, we designed and constructed rectangular obstructions  
2            on opposite sides of a capillary (Supplementary Figure S2). The obstructions are three-dimensional  
3            microscopic rectangular blocks ( $W \times L$ :  $60 \mu\text{m} \times 40 \mu\text{m}$ ) that are spaced at 16 or 24  $\mu\text{m}$  apart with  
4            different heights ranging from 6 to 18  $\mu\text{m}$  as shown in Figure 3 A) i). To visualize the lithography  
5            structures, we dope the NOA81 optical adhesive with the fluorescent dye rhodamine B. From  
6            optimizing dye concentration, we chose a higher dosage of 20 mg/mL, which improved flatness of a  
7            lithography layer (Supplementary Figure S3). The flow profile of a standard capillary tube is first  
8            calibrated with 1  $\mu\text{m}$  fluorescent microspheres suspended  $1 \times$  PBS and drawn into the *MILL* capillary  
9            tube with an automated syringe pump (Harvard Apparatus). Figure 3 A) ii) shows a cross section of the  
10           flow profile indicating a parabolic velocity distribution ranging from 0.2 mm/s to 0.8 mm/s that is  
11           typical of laminar flow in a capillary tube. Conversely, in the *MILL* capillary tubes, we showed  
12           heterogenous flow velocity that ranges from a 0.5 to 1.5 mm/s with shear stress  $\sim 1.2 \text{ dynes/cm}^2$  (Figure  
13           3 A) iii)). Fluid flow within the cluster of microscopic obstructions was minimal ( $< 0.5 \text{ mm/s}$ ) and fastest  
14           between obstructions and capillary walls (1.5 mm/s). The same obstructions were also affected by a  
15           shear gradient around 100  $\mu\text{m}$  upstream and downstream. The micro-obstruction created a highly  
16           heterogenous fluid shear that range from 0.2 to 1.5  $\text{dynes/cm}^2$ , resembling *in vivo* tissue niches<sup>51</sup>.

17            Next, we determined if the localized regions of shear gradient modulate shape, motility, and  
18            actin cytoskeleton of adherent cells. For this, fibroblast cells (L929) were first seeded and left to adhere  
19            onto thinly-coated collagen channels for the first hour as shown in Figure 3 B) i) and ii) (collagen  
20            coating is shown in Supplementary Figure S2). After which, cells were exposed continuously for up to  
21            12 hours of continuous homogenous and heterogenous fluid shear conditions as shown Figure 3 B) iii)  
22            and iv), respectively. Representative images of live cell QPM images shown in Figure 3 B) iii) and iv)  
23            identified changes in cell shape and more importantly, mobility. Regions of heterogenous fluid shear  
24            showed large changes in cell shape that appear to be sensitive to shear gradient as illustrated in Figure  
25            3 B) v). In Supplementary Video M2, there is a distinct difference in morphology between cells residing  
26            within low shear region ( $\sim \Delta 0 \text{ dynes/cm}^2$ ) and on margins of high shear stresses at  $\Delta 0.9 \text{ dynes/cm}^2$ . We  
27            then quantified cell motility under fluid shear change ( $\Delta 0$  and  $\Delta 0.9 \text{ dynes/cm}^2$ ) in Figure 3 B) iii) and  
28            iv), which showed a significant, 2-fold increase in cell motility in heterogenous fluid shear (Figure 3 B)  
29            vi)  $P < 0.05$ ). Here, we measured motility in stationary cells that actively formed protrusions (as in B)  
30            iv)) and cells that were actively migrating. Next, we used multiphoton imaging to capture the *MILL*  
31            microstructures (Rhodamine B), actin cytoskeleton arrangement (F-actin Phalloidin-Green) as well as  
32            collagen fibrils (white) along homogenous and heterogenous shear gradients. We observed that cells  
33            organize into distinct clusters around collagen fibers (Figure 3 B) vii-ix)). Importantly, extended actin

1 cytoskeleton appears to coincide with changes in shear stress as shown in Figure 3 B) vii) and viii) and  
2 minimal actin reorganization of the cells that resides within rectangular obstruction Figure 3 B) ix)  
3 (Supplementary Video M2).

4 We also correlate the direction in which bundles of collagen fibrils align before and after 12  
5 hours FSS exposure, shown in Figure 3 C) i) and ii). Our results indicate both collagen matrix and  
6 adherent fibroblast cells align to fluid shear gradients. Homogeneous FSS modulated fibroblasts appear  
7 to exert more force on the collagen matrix than those exposed to heterogeneous FSS Figure 3 C) i) and  
8 ii)). This behavior is consistent with the proto-myofibroblast phenotype that has been known to exert  
9 forces onto collagen matrix. Because of the high density of clustered cells, it was not possible to quantify  
10 single actin fibers as shown in Figure 2 D). Instead, we measured the distribution of fluorescence  
11 intensity at different compartments of the cell body (Figure 3 C) iii-vi)). The magnitude of fluorescence  
12 intensity indicates bundling of actin fibers in each cell <sup>52</sup>. Without any FSS stimulus, the actin  
13 fluorescence signals appear to be evenly distributed in adherent cells with minimal actin bundling.  
14 Adherent cells exposed to either homogenous and heterogenous FSS possessed a significant ( $P < 0.05$ )  
15 increase in actin bundles along the cell periphery and elongated cell shapes, where homogeneous shear  
16 induced 58% higher peripheral actin compared to no shear ( $P < 0.001$ ). On the other hand, homogeneous  
17 FSS (shear gradient of  $\Delta 0$  dynes/cm<sup>2</sup>, Figure 3 C) vii), stimulated slightly higher increase (~13 %) of  
18 actin bundles than heterogenous FSS (shear gradient of  $\Delta 0.2$  and  $\Delta 1.2$  dynes/cm<sup>2</sup>, Figure 3 C) vii)).  
19 These findings indicate that lower heterogenous FSS can lead to an increase in actin bundling and cell  
20 adhesion.

21  
22 *Aberration correction needed for MILL cylindrical capillary tubes*

23  
24 The effects of FSS are most pronounced on cells marginating along the cylindrical walls of  
25 blood vessels. We next determined if *MILL* could mimic the influence of homogenous and  
26 heterogeneous FSS on a cylindrical wall, where an irregular microstructure creates a non-symmetrical  
27 shear disruption resembling a vascular stenosis <sup>45</sup>. We first perform computational fluid dynamic (CFD)  
28 modelling to calculate the expected flow rates in a cylindrical tube with inner diameter of 200  $\mu\text{m}$  as  
29 shown in Figure 4 A) i) smooth wall and ii) 20% narrowing (stenosis). Along the walls of the 20%  
30 narrowing, the fluid flow velocity increased from 0 to 0.3 mm/s within 5  $\mu\text{m}$  from the surface, compared  
31 to 24  $\mu\text{m}$  on a smooth wall. Alteration of shear forces along an injured wall not only regulates movement  
32 of cells and platelets, it also influences the coagulation pathways involved in thrombus formation <sup>53</sup>.  
33 Cylindrical glass tubes are known to degrade optical performance <sup>54</sup>. To counter this, we used our Raster  
34 Adaptive Optics (RAO) method <sup>55</sup> to achieve diffraction limited *MILL* performance which we termed



1 as Adaptive Optics (AO) *MILL*. Figure 4 B) i) shows the anticipated written structure of a single pillar  
2 without (orange) and with AO (red). We identified degraded optical performance shown in Figure 4 B)  
3 ii) and the amount of optical aberrations using RAO as shown in Figure 3 B) iii). Figure 4 B) iv) shows  
4 that aberration-corrected laser writing that display sharp edges, measured with QPM. AO *MILL* enables  
5 robust photolithography with a ~15% error in the structure's dimensions as shown Figure 4 C) v) and  
6 vi) in width and thickness. We show that the structure with AO *MILL* width and thickness was not  
7 significantly different from writing on a flat surface with minimal aberration (n=5), demonstrating that  
8 AO *MILL* achieves the writing resolution of the system. We conducted PTV, as shown Figure 4 D) at  
9 a flow rate of 1  $\mu\text{l}/\text{min}$  to experimentally show that the flow velocities match the expected CFD  
10 simulation (Figure 4 A)). We also measured the influence of *MILL* microstructures on the organization  
11 of collagen matrix as shown in Figure 4 E) i) and ii). While collagen fibrils adhered to the stenosis  
12 structure (red), the overall collagen alignment and distribution across the channel without and with  
13 stenosis do not differ significantly (Figure 4 D) iii)).

14

15 *Platelet aggregate and move under heterogeneous FSS*

16

17 The relationship between stenosis and FSS is crucial to our understanding of thrombus  
18 formation and blood clotting. While platelets are known to be uniquely sensitive to homogenous FSS,  
19 the rolling and mobility of adherent platelets around a stenosis is not well studied. Platelet adhesion and  
20 shape change remain important biophysical markers for thrombus stability and bleeding disorders<sup>53</sup>.  
21 Thus, we next show that AO-*MILL* can reveal adhesion and motility of individual platelets as they  
22 aggregate onto an adhesive ligand (e.g. collagen). We first coated a thin layer collagen on smooth and  
23 AO-*MILL* cylindrical capillary tubes as shown in Figure 5 A) i) and iv), respectively. Flow velocity of  
24 both smooth and AO- *MILL* tubes are shown in Figure 5 A) ii) and v), where AO- *MILL* generates  
25 heterogeneous shear around the stenosis. Each capillary tube inlet and outlet are connected to a reservoir  
26 containing citrated whole blood and a syringe pump, respectively. To form thrombi, the pump draws  
27 whole blood across the collagen-coated channel at arterial shear stress of  $81 \text{ dynes}/\text{cm}^2$  (shear rate:  $1800$   
28  $\text{s}^{-1}$ ). To visualize single platelets during thrombi formation, we incubated whole blood with anti-CD42a  
29 antibody (ThermoFisher Scientific) conjugated to AlexaFluor 594 to label platelet membrane. To  
30 observe thrombus formation in real time and in 3D, we used a video rate multiphoton microscope system  
31<sup>56</sup> to record a single volume every second and quantify platelets aggregating. Figure 5 A) iii) and vi)  
32 shows a maximum projection of a representative image of several island of thrombus formed after 10  
33 minutes of exposure to fluid shear in two different cylindrical tubes, smooth and stenotic capillary tubes  
34 respectively. Results in Figure 5 A) vi) indicates that heterogenous FSS affect the spatial organization

1 of the aggregating platelets. Platelet aggregates appear to organize along the shear direction and within  
2 the shear gradient adjacent to the stenosis. The spatial and temporal resolution (1  $\mu\text{m}$  and 20  
3 milliseconds, respectively) <sup>55</sup> in our system permits tracking of individual platelets adhering on the  
4 coated capillary walls (Figure 5 B)). Tracking results show platelets aggregating  $\sim 10 \mu\text{m}$  away from  
5 the stenosis possess an average motility of less than 0.1  $\mu\text{m/s}$ . However, at regions within  $\sim 10 \mu\text{m}$  and  
6 downstream to the stenosis, platelets aggregating along the shear stress gradient (55-60  $\text{dynes/cm}^2$ )  
7 moved along the flow direction at velocities of up to 2  $\mu\text{m/s}$  (Figure 5 B)). We also captured the 3D  
8 trajectory of rolling platelet aggregates as shown in Figure 5 C) i) and ii) and Supplementary Movie  
9 M3.

10

### 11 *Size of stenosis triggers platelet adhesion and aggregates*

12 Real time evaluation of platelet adhesion and aggregating profile under different FSS conditions  
13 are important functional parameters to determine clotting speed, and platelet dysfunction under a given  
14 fluid shear stress. Next, we extended *MILL* capillary tubes to determine the effects of a larger stenosis  
15 with greater heterogeneity in fluid shear stress. We anticipated the FSS gradients from the stenosis and  
16 formed platelet aggregate collectively amplify the clotting process to create a large thrombus at the  
17 center of the stenosis. To test this, we fabricated a concave structure that mimics an arteriosclerotic  
18 vessel <sup>57</sup> (Figure 6 A) i)) that disrupts flow velocity by an order of magnitude. Using CFD, we first  
19 simulate an input flow of 1  $\mu\text{l/min}$  (1.5  $\text{mm/s}$ ) that results in a steep gradient of flow velocity of  
20 approximately  $\sim 0.9 \text{ mm/s}$  (Figure 6 A) ii)). In contrast with the small 20% stenosis in the previous  
21 section, the wall flow velocity with concave structure generates a 3-fold higher acceleration. Using  
22 multiphoton microscopy, we measured thrombus formation shown in Figure 6 A) iii) that displays a  
23 single large platelet aggregate formed between the concave structure. Using the image, we conducted a  
24 second CFD model to estimate the velocimetry along with the thrombus as shown in Figure 6 iv) and a  
25 follow up PTV flow measurement in Figure 6) v). The formation of a single large thrombus on an  
26 existing stenosis exacerbates the changes in fluid shear to 144  $\text{dynes/cm}^2$  that would consequentially  
27 increase the size of the thrombus and drastically the overall flow gradient. Both simulation and  
28 experimental flow velocities confirm a steep acceleration of flow velocity to 1.8  $\text{mm/s}$  at the thrombus.  
29 For the sake of completeness, we further compared the volume of thrombi formed between homogenous  
30 and heterogenous FSS. We observed that homogenous FSS creates a landscape of evenly distributed  
31 thrombus across three fields of view spanning across 1  $\text{mm}$  in length (Figure 6 B) i)). However, in the  
32 case of heterogenous FSS, a single platelet aggregate can reach up to 25  $\mu\text{m}$  thick as shown in the center  
33 image of Figure 6 B) ii). The measured distribution of thrombus height also doubled (4  $\mu\text{m}$ ) before the

1 stenosis rather than after the stenosis. The overall volume of thrombi in heterogenous flow is around 4-  
2 fold higher than homogenous flow as shown in Figure 6 B) iii).

3

#### 4 *Increasing throughput of MILL capillaries for thrombosis screening*

5       Microfluidic devices have both throughput and technical advantages over traditional parallel-  
6 plate chambers and cone-and-plate viscometer<sup>58</sup>, such as the precise control of blood flow and the  
7 ability to perform multiple experiments with small blood sample volumes. In particular, microfluidics  
8 have demonstrated a major role for heterogenous FSS in the initiation and proliferation of platelet  
9 aggregation as well as affect antiplatelet therapy on platelet aggregation<sup>58</sup>. To increase the throughput  
10 of these *MILL* capillaries, we developed a simple PDMS clamp (Figure 7 A)) to mount multiple *MILL*  
11 capillaries and perform homogenous and heterogenous FSS assays in parallel. The role of the PDMS  
12 clamp is to secure the capillaries onto a glass slide to prevent sample drifting and rotation, while  
13 providing an imaging window and reservoir for immersion objectives. Capillary inlet and outlet tubings  
14 are connected and sealed with UV glue. The inner fluid shear profile can be modified with structures  
15 using computer aided design and *MILL*. Following the steps in the previous sections, incorporating  
16 multiple capillaries into a single chip allows coating individually or in parallel. Here we focus on  
17 collagen coating as shown in Figure 7 B) that is used to evaluate the variation in coating uniformity.  
18 Figure 7 C) demonstrates thrombus formed within capillaries generating homogenous and heterogenous  
19 FSS using anticoagulated blood treated with an antibody against CD42a, a platelet-specific membrane  
20 protein. Using QPM and automated stage scanning, we can rapidly identify and verify the total thrombus  
21 volume:area ratio, which is an indication of thrombus height and spread. Figure 7 D) shows the  
22 distribution of thrombi formed under shear stress of 81 dynes/cm<sup>2</sup> for 10 mins in four different capillary  
23 tubes, two which have a pair of *MILL* structures described in Figure 5. These structures were spaced  
24 apart by 100  $\mu\text{m}$ , where homogeneous flow is recovered (Figure 4 A) i)).

25       We subjected preformed thrombi in two tubes to flow of phosphate-buffered saline alone or  
26 containing a monoclonal Fab fragment (10  $\mu\text{g}/\text{ml}$ , clone 12A5) to human glycoprotein VI (GPVI) at 81  
27 dynes/cm<sup>2</sup>. GPVI is a platelet-specific membrane protein that binds to collagen and fibrin to mediate  
28 platelet adhesion and aggregation<sup>59</sup>. Hence, anti-GPVI Fab treatment will interfere with platelet GPVI-  
29 collagen adhesion and remove newly bound platelets at the periphery of the thrombus<sup>60</sup>. Hence without  
30 GPVI Fab treatment, we expect more platelet aggregation and thrombi with larger volume and area than  
31 treated thrombi, where platelet aggregates are looser. Our results show that homogeneous flow formed  
32 thrombi with area spanning from 10  $\mu\text{m}^2$  to 1000  $\mu\text{m}^2$  and volumes from 1  $\mu\text{m}^3$  to 500  $\mu\text{m}^3$ . GPVI Fab  
33 treatment to preformed thrombi resulted in the majority (76%) of thrombi with area and volume below

1 10  $\mu\text{m}^2$  and 100  $\mu\text{m}^3$ , respectively. The results also indicated that GPVI-treated thrombi exhibited a  
2 higher volume:area ratio, which we predict is due to lower adhesion forces altering thrombus  
3 contraction. Under heterogeneous shear, GPVI Fab treatment did not alter thrombi aggregation  
4 compared to homogeneous shear, where thrombi volume:area ratio and spreading were similar, with  
5 87% of thrombi below 10  $\mu\text{m}^2$ . Anti-GPVI Fabs are currently being evaluated as antithrombotic  
6 therapeutics as these reagents can interfere with aggregation<sup>61</sup> or disaggregate formed thrombi<sup>60,62</sup> but  
7 with minimal bleeding risk<sup>63,64</sup>. These differences between homogeneous and heterogeneous shear  
8 indicate shear disruption could modulate platelet adhesion and hence, alter the efficacy of treatments.

9

## 10 **Discussion**

11 In this study, we demonstrated that *MILL* outpaces (< 1 hour, Figure 1A) and overcomes the  
12 oversimplified laminar flow, 2D geometries of current fabrication techniques. *MILL* capillaries are  
13 accessible *in vitro* systems for studying live cell responses under a uniform (homogeneous) or mixed  
14 (heterogeneous) FSS landscape representing *in vivo* tissue and are tailored for flat or curved flow  
15 chambers. These FSS landscapes represent diverse *in vivo* physiological environments from low  
16 interstitial fluid shear in tissue niche to high fluid shear in vasculature. Importantly, our long-term live  
17 cell imaging results showed that heterogeneous FSS landscape produced fibroblasts with increased  
18 motility (Figure 3 B vi)), but reduced cell adhesion (lower peripheral actin) when compared to  
19 homogeneous FSS (Figure 3 C v)). Heterogeneous FSS modulates spatial temporal patterning of platelet  
20 aggregates and thrombus formation (Figure 5 and 6). Overall, *MILL* capillaries can be easily designed  
21 to suit conventional CFD modeling and enable quantitative measurement of heterogeneous fluid shear  
22 stress on adherent cells. The demonstration of parallel multi-*MILL* in Chip device also shows that it is  
23 possible to tailor different fluid shear stress in a high throughput fashion that could benefit screening of  
24 drug efficacy (Figure 7)

25

### 26 *Implication to fibrosis and thrombosis*

27 Our results demonstrate that the FSS landscape regulates cell adhesion in fibrosis and  
28 thrombosis. Homogeneous shear increased fibroblast surface adhesion (Figure 2 B ii)) and actin fiber  
29 alignment to the shear direction (Figure 2 D)) by 2-fold in fibroblasts—a response similar to endothelial  
30 cells exposed to 15 dynes/cm<sup>2</sup> of FSS<sup>65</sup>. However, fibroblasts under heterogeneous FSS resembling  
31 interstitial flow ( $\Delta 0.2 - 1.2$  dynes/cm<sup>2</sup>) were ~ 3 times more motile (Figure 3 B vi)) and exhibited 50%  
32 increase in peripheral actin (Figure 3 C)) compared to homogeneous shear. Likewise, heterogeneous  
33 FSS increased platelet translocation (Figure 5 B)) and thrombus contraction by at least 2-folds (Figure

1 6 B) iii)) compared to homogeneous flow. Therefore, exposing cells to homogeneous or heterogeneous  
2 FSS can lead to different conclusions on how fibroblasts and platelets mobilize during fibrosis and  
3 thrombosis *in vitro* and *in vivo*. To gain better insight into how heterogeneous shear controls these cell  
4 decisions, future efforts will identify the membrane receptors (e.g. transient receptor potential (TRP)  
5 and Piezo protein families) and signaling pathways responsible for sensing FSS in fibroblasts and  
6 platelets.

7

8 *Implication for organ on chip culture: substrate mechanics and nutrient exchange in glass versus*  
9 *PDMS*

10 An extension of *MILL* is to generate customized niches for organ on a chip approaches using  
11 UV-curable hydrogels<sup>66,67</sup> in glass capillaries. *In vivo*, organs consist of stromal tissue with complex a  
12 micrometer-scale matrix that produces a heterogeneous FSS landscape. Maintaining the fabrication  
13 resolution is important for reproducing this matrix. Hence, we further improve on *MILL* with adaptive  
14 optics to correct for sample aberrations during fabrication. The 2-fold improvement in precision that  
15 *AO MILL* (Figure 4 C)) provides will be important for irregular niches such as bone sinusoids<sup>19</sup> and  
16 mechanically flexible scaffolds for cardiac cells contraction<sup>68</sup>. In this study we created a niche  
17 mimicking interstitial tissue with heterogeneous FSS using *MILL* structures spaced apart by 16 or 24  
18  $\mu\text{m}$  (Figure 3 A)). By opting for glass capillaries instead of PDMS, we avoid the non-specific  
19 sequestration of hydrophobic molecules in PDMS, which constitute up to 60% of small molecule drugs  
20<sup>26</sup>, but at the expense of gas permeability<sup>69</sup>. To support long-term cell culture growth in this niche, we  
21 used a HEPES-based buffer that does not require  $\text{CO}_2$  and non-sterile conditions for 12-hour flow  
22 experiments (Figure 2 and 3). Restricted gas exchange within the glass capillary tube means fibroblast  
23 differentiation and organ development studies lasting >12 hours will require dedicated fluidic setups to  
24 maintain nutrient supply, sterility, pH,  $\text{CO}_2$  and  $\text{O}_2$  levels in the culture medium. Existing commercial  
25 fluidic pump systems circumvent these demands by integrating a closed fluid circuit within  $\text{CO}_2$   
26 incubators.

27

28 *Implication for cell adhesion in metastatic diseases.*

29 When fibroblasts were cultured in heterogeneous FSS (*i.e.*,  $\Delta 0.2\text{-}1.2$  dynes/cm<sup>2</sup>, Figure 3 C)),  
30 we observed cell translocation against the flow direction (see Supplementary Video M2). This response  
31 to flow (rheotaxis) is critical for leukocyte rolling<sup>70</sup> in vasculature and metastatic cancer cells<sup>71</sup>, which  
32 can migrate toward a blood vessel and against a flow gradient. Epithelial tumors (e.g. breast cancer)  
33 undergo an epithelial to mesenchymal transition (EMT) characterized by gene expression and cell

1 morphology resembling mesenchymal cells <sup>71</sup>. Cancer-associated fibroblasts (CAF) similarly facilitate  
2 cancer migration by remodeling the surrounding ECM <sup>72</sup>. Elucidating the direct effect of FSS and the  
3 contribution of secondary cell mediators to cancer metastasis will be important questions that *MILL*  
4 capillaries can address. A key question is whether cancer cells sense heterogeneous FSS to trigger EMT  
5 and heterogeneity is regulated by other cells including myofibroblasts <sup>20</sup> and macrophages <sup>73</sup>, which can  
6 produce, remodel and pull the ECM.

7  
8

### 9 *Identifying shear conditions that commit cells to divergent cell fates*

10 Adherent and differentiated cells exist in a niche that supports their survival and proliferation,  
11 but how does the niche mechanically select for the differentiated cell? *MILL* capillaries recreate an  
12 environment resembling interstitial flow with ‘niches’ of accelerating and decelerating FSS gradients  
13 up to  $\Delta 1.2$  dynes/cm<sup>2</sup> (Figure 3 A)). *In vivo* shear conditions feature a mix of diverging and converging  
14 fluid paths, that is insufficiently described as laminar. Hence, we describe these fluid shear landscapes  
15 in *MILL* capillaries as homogeneous or heterogeneous (Figure 8). We show that these niches regulate  
16 fibroblast transition to a proto-myofibroblast state that were up to 3 times more motile (Figure 3 B vi))  
17 but exhibited 20% less actin bundling (Figure 3 C)) than under homogeneous FSS. Hence, these flow  
18 niches act as a mechanical stimulus and generate a shear ‘map’ that regulates fibroblast differentiation.  
19 ECM stiffness in cell differentiation is well established <sup>20</sup>, but evidence shows that FSS is also essential  
20 for the differentiation of embryonic stem cells <sup>21</sup>, endothelial cells <sup>23</sup> and fibroblasts <sup>35</sup>. Future efforts  
21 will assess how shear and chemical (e.g. TGF- $\beta$ ) affects the rate of differentiation using molecular  
22 markers (e.g.  $\alpha$ -smooth muscle actin and cadherin-11) and ECM production (e.g. collagen) as markers  
23 of differentiation.

24

### 25 *Scaling for high throughput screening of pathophysiological responses*

26 Multiwell plates remain the workhorse platform for *in vitro* high throughput screening (HTS)  
27 assays of cell behavior. However, current fabrication techniques require hours to replicate the *in vivo*  
28 FSS landscape of stroma and vasculature, that *MILL* achieves in less than an hour. The fabrication  
29 speed sets *MILL* as a versatile tool to prototype complex *in vivo* FSS landscapes within a single capillary  
30 tube, that could not be easily achieved using soft lithography or fused deposition techniques (Figure 2  
31 A). Using *MILL* we address these restrictions using a standard multiphoton imaging system (Figure 2)  
32 to precisely (~15% error) modify FSS within commercial glass capillary tubes (Figure 4 B v) and vi)).  
33 We employed 4 capillary tubes in a single chip assay (Figure 7), which can be scaled for even greater

1 throughput. Incorporating *in vivo* flow parameters to assays will benefit preclinical screening of drug  
2 pharmacokinetic and pharmacodynamic properties <sup>2</sup>. However, as with current HTS methods, machine  
3 automation to control flow and reagent input will be required to achieve larger biological scales.

4 By assembling unstructured and structured capillaries into a fluidic chip (Figure 7), we  
5 demonstrate high throughput platelet function testing under laminar (*i.e.*, homogeneous, 81 dynes/cm<sup>2</sup>)  
6 and *in vivo* (*i.e.*, heterogeneous, > Δ10 dynes/cm<sup>2</sup>) FSS. Considering heterogeneous FSS abolishes the  
7 effect of an antithrombotic drug treatment (Figure 7 D)), coagulation under heterogeneous FSS could  
8 be important to infer a patient's platelet activation status and response to vascular damage or pathology.  
9 Current coagulation assays do not account for heterogeneous shear although these represent *in vivo*  
10 vasculature (e.g. atherosclerosis <sup>57</sup>) that are clinically relevant for patients undergoing cardiac surgery.  
11 Hence, clotting assays that incorporate heterogeneous flow and shear stress could be used as a screening  
12 test for preoperative care and antithrombotic drug selection.

13

## 14 **Conclusion**

15 Fluidic channels with a smooth surface and homogeneous flow are commonly applied for live  
16 cell assays, despite such surface and flow not existing *in vivo*. *MILL* delivers rapid prototyping of  
17 diverse *in vivo* topologies and shear landscapes with submicron resolution and minutes-fabrication  
18 speed exceeding current fabrication techniques. *MILL* enables us to study cell adhesion and spreading  
19 under a FSS landscape recapitulating *in vivo* tissue within a capillary using routine consumables and is  
20 suited for high throughput cell assays to organ-in-a-chip assays. Using *MILL*, we identified differences  
21 in cell responses under homogeneous and heterogeneous FSS regimes in fibroblasts and platelets. We  
22 showed that fibroblasts on collagen sense and respond to FSS by taking on a protomyofibroblast  
23 phenotype with increased motility and substrate adhesion, while heterogeneous FSS further increases  
24 motility with reduced substrate adhesion. *MILL* enables writing of irregular structures resembling small  
25 (60 μm) to large (200 μm) vascular stenoses forming heterogeneous FSS that triggers increased platelet  
26 aggregation and translocation. Using a Multi-*MILL* in Chip design, we increase the capacity and  
27 throughput of homogeneous and heterogeneous FSS assay toward drug screening applications. *MILL*  
28 will open new *in vitro* exploration of unique physiological shear environments for biological and  
29 pharmacological assays that are otherwise limited to complex microfluidic systems and clinical  
30 correlation studies. *MILL* assays can therefore capture *in vivo* cell responses under both physiological  
31 and pathological landscapes that are of key importance in disease modeling and testing.

32

33

## 1 **Methods**

### 2 Preparation of Capillary Chips

3 For all experiments, borosilicate capillaries were cut to a length of 35 mm (rectangular tubes)  
4 or 85 mm (circular tubes) and mounted onto 75 mm × 26 mm microscopy glass slides. Rectangular  
5 capillaries (W × H; 0.3 mm × 0.1 mm, VitroCom, Mountain Lakes, NJ, USA) were secured onto the  
6 glass slide using NOA81 UV adhesive (Norland Products, Cranbury, NJ, USA) with a UV curing  
7 system (365 nm, Thorlabs, Newton, NJ, USA) at 20% intensity for 5 seconds. To secure circular tubes  
8 (ID: 0.2 mm, VitroCom) onto glass slides, a mold formed with circular capillaries was used to create a  
9 PDMS clamp as shown in Figure 6 A). Capillary ends were inserted into Tygon inlet and outlet tubing  
10 (ID: 0.51 mm, Saint-Gobain, Courbevoie, France), which was sealed with NOA63 UV adhesive  
11 (Norland Products) and UV-cured at 20% intensity for 30 seconds.

12

### 13 MILL and RAO MILL

14 UV adhesive for *MILL* was prepared by dissolving Rhodamine B (20 mg/mL, Townson &  
15 Mercer, Australia) in NOA81 UV adhesive (Norland Products) by manual mixing and through a  
16 suspension mixer for 2 hours and then injected into borosilicate capillaries with a 1 mL syringe. *MILL*  
17 was performed using a custom-built polygon scanning microscope<sup>56</sup> with a Ti-Sapphire pulse laser  
18 (Spectra Physics, MKS Instruments, Inc., Andover, MA, USA) tuned to 810 nm with a pulse width of  
19 100 fs and repetition rate of 82 MHz. We used an average laser power of 22 mW and 1.2 mW after the  
20 20× water-immersion objective lens (W Plan Apochromatic, 1.00 NA, Zeiss, Germany) for *MILL* and  
21 imaging, respectively. Patterning of microstructures using 2PP was achieved by restricting the scanning  
22 range to 6 μm × 4 μm at the image plane and translating the scanned region laterally with galvo mirrors  
23 to form the structure. Depth of the *MILL* structures was controlled with the sample stage (3DMS, Sutter  
24 Instrument, Novato, CA, USA) and tested for lithography precision (see Figure 3 B) v-vi)). *MILL* was  
25 also replicated on an Olympus FVMPE-RS multiphoton microscope controlled by the Fluoview  
26 software (data not shown). Unpolymerized adhesive was washed out with acetone and ultrapure water  
27 (Milli-Q, Merck, Rahway, NJ, USA).

28 RAO was performed as previously described<sup>55</sup>. Briefly, the sample aberrations were  
29 determined at a depth matching the height of the structure to be written. The deformable mirror is  
30 stepped through the first 11 Zernike modes (excluding tilt, piston and defocus) and amplitudes using  
31 the fluorescence signal as feedback. The identified Zernike mask was then applied to the entire *MILL*  
32 structure.

33



## 1 Expression and Purification of Anti-GPVI Fab

2 Mouse anti-human GPVI monoclonal antibodies were generated (The WEHI Antibody Facility,  
3 Melbourne, Australia) and isolated from hybridoma supernatant as previously described<sup>61</sup>. Antibody  
4 in the hybridoma supernatant was purified by passing through a column of DEAE Affigel blue (Bio-  
5 Rad, Sydney, NSW, Australia), dialysed into a Tris-saline buffer (Tris 10 mM, NaCl 150 mM, pH 7.4)  
6 then affinity purified on a protein A sepharose column (GE Healthcare, Chicago, IL, USA). Bound  
7 antibody was eluted with 0.1 M Glycine pH 2.4 and neutralised with 1 M Tris pH 8.5. Purified antibody  
8 was then dialysed into phosphate buffered saline (NaCl 137 mM, KCl 2.7 mM, KH<sub>2</sub>PO<sub>4</sub> 1.8 mM,  
9 Na<sub>2</sub>HPO<sub>4</sub> 10 mM, pH 7.4). Fab fragments were generated from these antibodies using a Fab  
10 preparation kit (Pierce Biotechnology, Rockford, IL, USA) according to manufacturer's instructions.

## 11 12 Cell Culture and Shear Assays

13 All cell culture reagents were purchased from Thermo Fisher Scientific (Waltham, MA, USA).  
14 Murine L929 fibroblasts (ATCC, Manassas, VA, USA) were maintained in low glucose (1 g/L) DMEM  
15 supplemented with 10% fetal bovine serum, L-glutamine (4 mM) and pyruvate (1 mM) at 37°C and 5%  
16 CO<sub>2</sub>. Cells were split 1:6 at 80% confluence.

17 For shear assays, fibroblasts in growth phase were detached with trypsin-EDTA (0.05%) and  
18 centrifuged at 300 × g for 5 minutes. Supernatant was removed and cells were resuspended at 2.5 × 10<sup>5</sup>  
19 cells/mL in 1 mL of HEPES-Krebs buffer (120 mM NaCl, 22 mM HEPES, 4.6 mM KCl, 1 mM MgSO<sub>4</sub>,  
20 155 μM Na<sub>2</sub>HPO<sub>4</sub>, 412 μM KH<sub>2</sub>PO<sub>4</sub>, 5 mM NaHCO<sub>3</sub>, 1 g/L glucose, 1.5 mM CaCl<sub>2</sub>, pH 7.4)  
21 supplemented with 10% (w/v) fetal bovine serum. Cells were seeded on glass-bottom dishes (no FSS  
22 condition) or flowed into the capillary at 2.5 mL/min (with FSS) on a stage heated to 37°C and allowed  
23 to settle for 1 hour. Krebs-HEPES buffer was then flowed through at different velocities equating to  
24 shear stress values of (0 – 3.5 dynes/cm<sup>2</sup>) for up to 12 hours and numbers and behavior of adherent cells  
25 were monitored with label-free quantitative phase imaging.

## 26 27 Capillary Thrombus Assay

28 Circular capillaries (ID: 0.2 mm, 65 μm wall thickness) were precoated with Type-I Collagen  
29 (HORM, Takeda Austria GmbH, Linz, Austria) for 1 hour and washed with 1× PBS at a flow rate of 80  
30 μL/min for 5 minutes. Whole blood was collected in citrated (3.2% w/v, Sigma-Aldrich, St. Louis, MI,  
31 USA) saline and incubated for 30 min with anti-CD42a antibody (1/100 dilution, clone FMC-25,  
32 Thermo Fisher Scientific) conjugated to AlexaFluor 594. The blood was flowed using a syringe pump  
33 (PhD Ultra, Harvard Apparatus, Holliston, MA, USA) on withdraw mode and at a shear stress of 1800

1 s<sup>-1</sup> for 10 min, followed by PBS or anti-GPVI Fab (10 µg/ml in PBS, clone 12A5) for another 10 min.  
2 Thrombi were fixed with 4% paraformaldehyde (Sigma-Aldrich) for 10 minutes and then washed with  
3 PBS for 10 minutes under 80 µl/min flow. All blood samples were taken with consent from each donor  
4 and approved by the ANU research ethics office (2022/372).

#### 5 Multiphoton Imaging and Deconvolution

6 Rapid live imaging of thrombi formation was performed using a custom-built polygon scanning  
7 microscope<sup>56</sup> at 20 frames per second and rapid volumetric scanning (21 Z-slices per stack) was  
8 achieved by tuning the defocus Zernike amplitude on a deformable mirror conjugated to the back focal  
9 plane of the objective. Fluorescence emission was measured through a detection unit consisting of 2  
10 dichroic mirrors (FF-562-Di02, Semrock, IDEX Health & Science, Rochester, NY, USA), emission  
11 filters (FF01-514/44 and FF01-624/40, Semrock) and three GaAsP photomultiplier tubes (H7422-40,  
12 Hamamatsu, Hamamatsu City, Japan).

13 SHG and actin imaging were performed with an Olympus FVMPE-RS multiphoton microscope  
14 and a 25× water-immersion objective lens (XL PLAN W MP, 1.05 NA, Olympus, Tokyo, Japan). The  
15 excitation laser was tuned to 900 nm at a laser power setting of 15% and emission signal detected  
16 through an FV30-FVG filter set (dichroic: SDM475, emission filters: BA410-455 and BA495-540) and  
17 2 GaAsP photomultiplier detectors. Volumetric images were obtained with a resonant mirror scanning  
18 at 15 frames per second with 8-line averaging.

19 A customized ImageJ macro based on the CLIJ2 plugin<sup>74</sup> was written for deconvolving  
20 volumetric images obtained from the polygon 2P microscope. Images were deconvolved using the  
21 Lucy-Richardson algorithm with 20 iterations and an experimental PSF obtained from imaging of 1 µm  
22 yellow-green, fluorescent beads (Polysciences, Warrington, PA, USA).

23

#### 24 Confocal Imaging

25 High resolution confocal imaging of actin was performing with a Leica SP5 microscope with  
26 488 nm and 561 nm excitation lasers and 63× oil immersion objective (HCX PL APO, 1.4 NA, Leica  
27 Microsystems, Wetzlar, Germany). Fluorescence emission was measured using hybrid GaAsP detectors  
28 and emission cutoffs of 502-545 nm for Actin Green and 584-660 nm for rhodamine B. Scanning was  
29 performed with a 4-line averaging and pinhole set to 1 Airy Unit.

30

#### 31 Label-free Quantitative Phase Microscopy

32 Quantitative phase microscopy was performed using a custom-built imaging system with a 514  
33 nm laser (OBIS 514nm LS 20mW Laser, Coherent Inc., Santa Clara, CA, USA). The laser coupled to

1 an optical fiber, which was then split into an object and reference path. Light from the object path is  
2 collimated and passed through the sample and imaged through a 20× microscope objective (UCPlanFL  
3 N, 0.4 NA, Olympus). The transmitted light is interfered with the reference light and was captured by  
4 a CMOS camera (BFS-U3-32S4, Teledyne FLIR LLC, Wilsonville, OR, USA). The phase information  
5 was reconstructed by an open-source MATLAB program (DHM\_MATLAB\_ANUAOLAB, V4.0.  
6 Source code available at [https://github.com/PurelyWhite/DHM\\_MATLAB\\_ANUAOLAB](https://github.com/PurelyWhite/DHM_MATLAB_ANUAOLAB)) and  
7 visualized in Fiji (ImageJ).

8

### 9 Computational fluid dynamics simulations

10 Flow simulation was performed using COMSOL Multiphysics software (Burlington, MA,  
11 USA). Briefly, blood or plasma were represented as a Newtonian fluid with the viscosity of water (1  
12 mP s). The mass inflow of 1 mg/min (corresponding to 1  $\mu$ l/min) in a cylindrical vessel of 200  $\mu$ m  
13 diameter and 800  $\mu$ m length was considered as boundary condition for the inlet and zero pressure for  
14 the outlet. No-slip boundary conditions were chosen for the rest of the system boundaries and laminar  
15 flow module with incompressible fluid approximation was used for numerical analysis of a stationary  
16 Navier-Stokes equations solution. Magnitudes of flow velocities were extracted in a regular grid with  
17 1  $\mu$ m spatial resolution. 3D reconstruction of the stenosis geometry was performed with Fiji (ImageJ)  
18 capability to render a wavefront object from a volumetric scan of a MILL structure. The triangulation  
19 parameters were kept default (threshold 50, resampling factor 2). The Wavefront objects were imported  
20 into the Autodesk Fusion 360 (Autodesk, San Rafael, CA, USA) as the mesh object. Each mesh object  
21 was cleaned from noise and smoothed. An array of surfaces was created to obtain a set of projection  
22 sketches as an intersection of a mesh body with a surface. The capillary object was created as a  
23 transitional shape between projection border profiles and saved in the appropriate format for the  
24 COMSOL Multiphysics import.

25

### 26 Particle Tracking Velocimetry

27 1  $\mu$ m yellow-green beads (Polysciences) were flowed through a capillary tube by pulling at 250  
28 nL/min (rectangular capillary) or 1  $\mu$ l/min (circular capillary) and imaging was performed by resonant  
29 scanning in the Olympus multiphoton (scanning at 22 Hz) or polygon scanning microscope (25 Hz)  
30 with AO, respectively. Beads were tracked using TrackMate<sup>75</sup> to obtain the velocity and trajectory  
31 using the Kalman filter for homogeneous flow or simple LAP tracker for heterogeneous flow, and a  
32 maximum spot displacement threshold of 20  $\mu$ m.

33

## 1 Measurement of Collagen and Actin Morphometric Phenotyping

2 Collagen fiber alignment was measured using the MATLAB code CT-FIRE developed by Liu  
3 and colleagues <sup>76</sup>. For this, a volumetric SHG scan was analyzed and collagen angle at each Z-slice  
4 quantitated.

5 Actin alignment of high-resolution confocal images was measured using a MATLAB  
6 (MathWorks, Natick, MA, USA) script written by Lickert *et al.* for cell segmentation and actin fiber  
7 measurements <sup>48</sup>. Quantitation of peripheral actin density was performed using the Measure Object  
8 Intensity Distribution module in Cell Profiler <sup>77</sup>.

9

## 10 Cell and Platelet Tracking

11 Time lapse videos of L929 cells and platelets were tracked using TrackMate. Individual  
12 platelets were identified using the Laplacian or Gaussian detector. Due to variations in the cell  
13 morphology, cell segmentation was performed using the Thresholding detector or CLIJ2 Voronoi Otsu  
14 Labeling, dependent on which distinguished individual or clustered cells more accurately. To remove  
15 misidentified tracks, each result was optimized for maximum track length, and mean directional change.  
16 The selection of filters on spots and tracks with the relevant parameters setting were tuned for each  
17 dataset to achieve the best tracking performance. Analysis of cell motility and morphology was done  
18 based on the tracking data provided by TrackMate.

19

## 20 Measurement of Cell Ellipticity

21 Reconstructed quantitative phase images with height information of the cells were plotted with  
22 the Fiji function '3D Surface Plot' with a custom-developed user interface for parameter control  
23 (viewing angle in XY plane, viewing angle in XZ plane, perspective, smoothing and global height  
24 modification). The self-developed user interface was used to provide the side projections (XZ  
25 projection) of the cells and to generate a mask of the cell surface. The surface was fitted to an ellipse,  
26 where the height and length of the cells were used to calculate cell ellipticity according to the definition  
27 of first flattening ( $f = 1 - b/a$ ), where 'b' is the longer axis and 'a' is the shorter axis.

28

## 29 Statistical Analysis

30 Data were analyzed using Prism (version 9.3.1, Graphpad Software, San Diego, CA, USA).  
31 Ordinary one-way and two-way ANOVAs were performed with Tukey's test. Unpaired parametric t-  
32 tests were performed with P-values calculated using two-tailed analysis.

## 1   **References**

- 2   1     Qin, D., Xia, Y. & Whitesides, G. M. Soft lithography for micro- and nanoscale  
3     patterning. *Nature Protocols* **5**, 491-502, doi:10.1038/nprot.2009.234 (2010).
- 4   2     Hou, X. *et al.* Interplay between materials and microfluidics. *Nature Reviews Materials*  
5     **2**, 17016, doi:10.1038/natrevmats.2017.16 (2017).
- 6   3     David J. Beebe, Glennys A. Mensing, a. & Walker, G. M. Physics and Applications of  
7     Microfluidics in Biology. *Annual Review of Biomedical Engineering* **4**, 261-286,  
8     doi:10.1146/annurev.bioeng.4.112601.125916 (2002).
- 9   4     Kajtez, J. *et al.* 3D-Printed Soft Lithography for Complex Compartmentalized  
10    Microfluidic Neural Devices. *Advanced Science* **7**, 2001150,  
11    doi:<https://doi.org/10.1002/advs.202001150> (2020).
- 12  5     Beh, C. W., Zhou, W. & Wang, T.-H. PDMS–glass bonding using grafted polymeric  
13    adhesive – alternative process flow for compatibility with patterned biological  
14    molecules. *Lab on a Chip* **12**, 4120-4127, doi:10.1039/C2LC40315C (2012).
- 15  6     Fiorini, G. S. & Chiu, D. T. Disposable microfluidic devices: fabrication, function, and  
16    application. *BioTechniques* **38**, 429-446, doi:10.2144/05383rv02 (2005).
- 17  7     Toepke, M. W. & Beebe, D. J. PDMS absorption of small molecules and consequences  
18    in microfluidic applications. *Lab on a Chip* **6**, 1484-1486, doi:10.1039/B612140C  
19    (2006).
- 20  8     Liao, C., Anderson, W., Antaw, F. & Trau, M. Two-Photon Nanolithography of  
21    Tailored Hollow three-dimensional Microdevices for Biosystems. *ACS Omega* **4**, 1401-  
22    1409, doi:10.1021/acsomega.8b03164 (2019).
- 23  9     Maruo, S. & Fourkas, J. T. Recent progress in multiphoton microfabrication. *Laser &*  
24    *Photonics Reviews* **2**, 100-111, doi:<https://doi.org/10.1002/lpor.200710039> (2008).
- 25  10    Qin, D. *et al.* Structural colour enhanced microfluidics. *Nat Commun* **13**, 2281,  
26    doi:10.1038/s41467-022-29956-4 (2022).
- 27  11    S P Suter, a. & Skalak, R. The History of Poiseuille's Law. *Annual Review of Fluid*  
28    *Mechanics* **25**, 1-20, doi:10.1146/annurev.fl.25.010193.000245 (1993).

- 1 12 King, R. B., Raymond, G. M. & Bassingthwaite, J. B. Modeling blood flow  
2 heterogeneity. *Annals of Biomedical Engineering* **24**, 352-372,  
3 doi:10.1007/BF02660885 (1996).
- 4 13 Saqr, K. M. *et al.* Physiologic blood flow is turbulent. *Sci Rep* **10**, 15492,  
5 doi:10.1038/s41598-020-72309-8 (2020).
- 6 14 Ito, Y. *et al.* Turbulence Activates Platelet Biogenesis to Enable Clinical Scale Ex Vivo  
7 Production. *Cell* **174**, 636-648 e618, doi:10.1016/j.cell.2018.06.011 (2018).
- 8 15 Miteva, D. O. *et al.* Transmural flow modulates cell and fluid transport functions of  
9 lymphatic endothelium. *Circ Res* **106**, 920-931,  
10 doi:10.1161/CIRCRESAHA.109.207274 (2010).
- 11 16 Follain, G. *et al.* Fluids and their mechanics in tumour transit: shaping metastasis.  
12 *Nature Reviews Cancer* **20**, 107-124, doi:10.1038/s41568-019-0221-x (2020).
- 13 17 Al-Tamimi, M. *et al.* Pathologic shear triggers shedding of vascular receptors: a novel  
14 mechanism for down-regulation of platelet glycoprotein VI in stenosed coronary  
15 vessels. *Blood* **119**, 4311-4320, doi:10.1182/blood-2011-10-386607 (2012).
- 16 18 Polacheck, W. J., Charest, J. L. & Kamm, R. D. Interstitial flow influences direction of  
17 tumor cell migration through competing mechanisms. *Proceedings of the National  
18 Academy of Sciences* **108**, 11115-11120, doi:doi:10.1073/pnas.1103581108 (2011).
- 19 19 Marturano-Kruik, A. *et al.* Human bone perivascular niche-on-a-chip for studying  
20 metastatic colonization. *Proceedings of the National Academy of Sciences* **115**, 1256-  
21 1261, doi:doi:10.1073/pnas.1714282115 (2018).
- 22 20 Pakshir, P. *et al.* The myofibroblast at a glance. *J Cell Sci* **133**, doi:10.1242/jcs.227900  
23 (2020).
- 24 21 Yourek, G., McCormick, S. M., Mao, J. J. & Reilly, G. C. Shear stress induces  
25 osteogenic differentiation of human mesenchymal stem cells. *Regen Med* **5**, 713-724,  
26 doi:10.2217/rme.10.60 (2010).
- 27 22 Wirtz, D., Konstantopoulos, K. & Searson, P. C. The physics of cancer: the role of  
28 physical interactions and mechanical forces in metastasis. *Nature Reviews Cancer* **11**,  
29 512-522, doi:10.1038/nrc3080 (2011).

- 1 23 Haase, K. *et al.* Physiologic flow-conditioning limits vascular dysfunction in  
2 engineered human capillaries. *Biomaterials* **280**, 121248,  
3 doi:10.1016/j.biomaterials.2021.121248 (2022).
- 4 24 Nesbitt, W. S. *et al.* A shear gradient-dependent platelet aggregation mechanism drives  
5 thrombus formation. *Nat Med* **15**, 665-673, doi:10.1038/nm.1955 (2009).
- 6 25 Yeung, C. K. *et al.* Tissue Chips in Space—Challenges and Opportunities. *Clinical and  
7 Translational Science* **13**, 8-10, doi:<https://doi.org/10.1111/cts.12689> (2020).
- 8 26 Ingber, D. E. Human organs-on-chips for disease modelling, drug development and  
9 personalized medicine. *Nature Reviews Genetics*, doi:10.1038/s41576-022-00466-9  
10 (2022).
- 11 27 Bretag, A. H. The glass micropipette electrode: A history of its inventors and users to  
12 1950. *Journal of General Physiology* **149**, 417-430, doi:10.1085/jgp.201611634 (2017).
- 13 28 Utada, A. S. *et al.* Monodisperse Double Emulsions Generated from a Microcapillary  
14 Device. *Science* **308**, 537-541, doi:doi:10.1126/science.1109164 (2005).
- 15 29 Guo, J. A new model of painting glass. *Glass Technology: European Journal of Glass  
16 Science and Technology Part A* **59**, 54-57, doi:10.13036/17533546.59.2.022 (2018).
- 17 30 Eschenbaum, C. *et al.* Hybrid lithography: Combining UV-exposure and two photon  
18 direct laser writing. *Opt. Express* **21**, 29921-29926, doi:10.1364/OE.21.029921 (2013).
- 19 31 Bernardeschi, I., Ilyas, M. & Beccai, L. A Review on Active 3D Microstructures via  
20 Direct Laser Lithography. *Advanced Intelligent Systems* **3**, 2100051,  
21 doi:<https://doi.org/10.1002/aisy.202100051> (2021).
- 22 32 Katz, B.-Z. *et al.* Physical State of the Extracellular Matrix Regulates the Structure and  
23 Molecular Composition of Cell-Matrix Adhesions. *Molecular Biology of the Cell* **11**,  
24 1047-1060, doi:10.1091/mbc.11.3.1047 (2000).
- 25 33 Garanich, J. S., Mathura, R. A., Shi, Z.-D. & Tarbell, J. M. Effects of fluid shear stress  
26 on adventitial fibroblast migration: implications for flow-mediated mechanisms of  
27 arterialization and intimal hyperplasia. *American Journal of Physiology-Heart and  
28 Circulatory Physiology* **292**, H3128-H3135, doi:10.1152/ajpheart.00578.2006 (2007).

- 1 34 Steward, R. L., Cheng, C.-M., Ye, J. D., Bellin, R. M. & LeDuc, P. R. Mechanical  
2 stretch and shear flow induced reorganization and recruitment of fibronectin in  
3 fibroblasts. *Scientific Reports* **1**, 147, doi:10.1038/srep00147 (2011).
- 4 35 Ng, C. P., Hinz, B. & Swartz, M. A. Interstitial fluid flow induces myofibroblast  
5 differentiation and collagen alignment in vitro. *Journal of Cell Science* **118**, 4731-4739,  
6 doi:10.1242/jcs.02605 (2005).
- 7 36 Yankaskas, C. L. *et al.* The fluid shear stress sensor TRPM7 regulates tumor cell  
8 intravasation. *Science Advances* **7**, eabh3457, doi:doi:10.1126/sciadv.abh3457 (2021).
- 9 37 Pakshir, P. *et al.* The myofibroblast at a glance. *Journal of Cell Science* **133**,  
10 doi:10.1242/jcs.227900 (2020).
- 11 38 Hinz, B. Formation and Function of the Myofibroblast during Tissue Repair. *Journal*  
12 *of Investigative Dermatology* **127**, 526-537, doi:<https://doi.org/10.1038/sj.jid.5700613>  
13 (2007).
- 14 39 Tomasek, J. J., Gabbiani, G., Hinz, B., Chaponnier, C. & Brown, R. A. Myofibroblasts  
15 and mechano-regulation of connective tissue remodelling. *Nature Reviews Molecular*  
16 *Cell Biology* **3**, 349-363, doi:10.1038/nrm809 (2002).
- 17 40 Vaghi, C., Fanciullino, R., Benzekry, S. & Pognard, C. Macro-scale models for fluid  
18 flow in tumour tissues: impact of microstructure properties. *Journal of Mathematical*  
19 *Biology* **84**, 27, doi:10.1007/s00285-022-01719-1 (2022).
- 20 41 Tschumperlin, D. J. Fibroblasts and the Ground They Walk On. *Physiology* **28**, 380-  
21 390, doi:10.1152/physiol.00024.2013 (2013).
- 22 42 Zhou, J. & Papautsky, I. Viscoelastic microfluidics: progress and challenges.  
23 *Microsystems & Nanoengineering* **6**, 113, doi:10.1038/s41378-020-00218-x (2020).
- 24 43 Popel, A. S. & Johnson, P. C. MICROCIRCULATION AND HEMORHEOLOGY.  
25 *Annual Review of Fluid Mechanics* **37**, 43-69,  
26 doi:10.1146/annurev.fluid.37.042604.133933 (2005).
- 27 44 Salter, P. S. & Booth, M. J. Adaptive optics in laser processing. *Light: Science &*  
28 *Applications* **8**, 110, doi:10.1038/s41377-019-0215-1 (2019).
- 29 45 Tang, D., Yang, C., Kobayashi, S., Zheng, J. & Vito, R. P. Effect of Stenosis  
30 Asymmetry on Blood Flow and Artery Compression: A Three-Dimensional Fluid-



- 1           Structure Interaction Model. *Annals of Biomedical Engineering* **31**, 1182-1193,  
2           doi:10.1114/1.1615577 (2003).
- 3    46       Solon, J., Levental, I., Sengupta, K., Georges, P. C. & Janmey, P. A. Fibroblast  
4           Adaptation and Stiffness Matching to Soft Elastic Substrates. *Biophysical Journal* **93**,  
5           4453-4461, doi:10.1529/biophysj.106.101386 (2007).
- 6    47       He, X. *et al.* Automated Fourier space region-recognition filtering for off-axis digital  
7           holographic microscopy. *Biomed. Opt. Express* **7**, 3111-3123,  
8           doi:10.1364/BOE.7.003111 (2016).
- 9    48       Lickert, S. *et al.* Morphometric analysis of spread platelets identifies integrin  
10          alphaIIb beta3-specific contractile phenotype. *Sci Rep* **8**, 5428, doi:10.1038/s41598-  
11          018-23684-w (2018).
- 12   49       Birmingham, K. G. *et al.* Lymph Node Subcapsular Sinus Microenvironment-On-A-  
13          Chip Modeling Shear Flow Relevant to Lymphatic Metastasis and Immune Cell  
14          Homing. *iScience* **23**, 101751, doi:10.1016/j.isci.2020.101751 (2020).
- 15   50       Williams, M. S., Longmuir, K. J. & Yager, P. A practical guide to the staggered  
16          herringbone mixer. *Lab Chip* **8**, 1121-1129, doi:10.1039/b802562b (2008).
- 17   51       Chary, S. R. & Jain, R. K. Direct measurement of interstitial convection and diffusion  
18          of albumin in normal and neoplastic tissues by fluorescence photobleaching.  
19          *Proceedings of the National Academy of Sciences* **86**, 5385-5389,  
20          doi:doi:10.1073/pnas.86.14.5385 (1989).
- 21   52       Elineni, K. K. & Gallant, N. D. Regulation of cell adhesion strength by peripheral focal  
22          adhesion distribution. *Biophys J* **101**, 2903-2911, doi:10.1016/j.bpj.2011.11.013 (2011).
- 23   53       Lin, J., Sorrells, M. G., Lam, W. A. & Neeves, K. B. Physical forces regulating  
24          hemostasis and thrombosis: Vessels, cells, and molecules in illustrated review. *Res*  
25          *Pract Thromb Haemost* **5**, e12548, doi:10.1002/rth2.12548 (2021).
- 26   54       Kostencka, J., Kozacki, T., Kus, A. & Kujawinska, M. Accurate approach to capillary-  
27          supported optical diffraction tomography. *Opt Express* **23**, 7908-7923,  
28          doi:10.1364/OE.23.007908 (2015).
- 29   55       Li, Y. *et al.* Raster adaptive optics for video rate aberration correction and large FOV  
30          multiphoton imaging. *Biomed Opt Express* **11**, 1032-1042, doi:10.1364/BOE.377044  
31          (2020).

- 1 56 Li, Y. X. *et al.* Flexible polygon-mirror based laser scanning microscope platform for  
2 multiphoton in-vivo imaging. *J Biophotonics* **10**, 1526-1537,  
3 doi:10.1002/jbio.201600289 (2017).
- 4 57 Thondapu, V. *et al.* High spatial endothelial shear stress gradient independently predicts  
5 site of acute coronary plaque rupture and erosion. *Cardiovasc Res* **117**, 1974-1985,  
6 doi:10.1093/cvr/cvaa251 (2021).
- 7 58 Montague, S. J., Lim, Y. J., Lee, W. M. & Gardiner, E. E. Imaging Platelet Processes  
8 and Function-Current and Emerging Approaches for Imaging in vitro and in vivo. *Front*  
9 *Immunol* **11**, 78, doi:10.3389/fimmu.2020.00078 (2020).
- 10 59 Perrella, G., Nagy, M., Watson, S. P. & Heemskerk, J. W. M. Platelet GPVI  
11 (Glycoprotein VI) and Thrombotic Complications in the Venous System. *Arterioscler*  
12 *Thromb Vasc Biol* **41**, 2681-2692, doi:10.1161/ATVBAHA.121.316108 (2021).
- 13 60 Ahmed, M. U. *et al.* Pharmacological Blockade of Glycoprotein VI Promotes  
14 Thrombus Disaggregation in the Absence of Thrombin. *Arterioscler Thromb Vasc Biol*  
15 **40**, 2127-2142, doi:10.1161/ATVBAHA.120.314301 (2020).
- 16 61 Al-Tamimi, M. *et al.* Anti-glycoprotein VI monoclonal antibodies directly aggregate  
17 platelets independently of FcγRIIIa and induce GPVI ectodomain shedding.  
18 *Platelets* **20**, 75-82, doi:10.1080/09537100802645029 (2009).
- 19 62 Gupta, S. & Brass, L. F. Glycoprotein VI Blockade: Not Just Targeting Collagen  
20 Anymore? *Arterioscler Thromb Vasc Biol* **40**, 1964-1966,  
21 doi:10.1161/ATVBAHA.120.315059 (2020).
- 22 63 Harbi, M. H., Smith, C. W., Nicolson, P. L. R., Watson, S. P. & Thomas, M. R. Novel  
23 antiplatelet strategies targeting GPVI, CLEC-2 and tyrosine kinases. *Platelets* **32**, 29-  
24 41, doi:10.1080/09537104.2020.1849600 (2021).
- 25 64 Borst, O. & Gawaz, M. Glycoprotein VI - novel target in antiplatelet medication.  
26 *Pharmacol Ther* **217**, 107630, doi:10.1016/j.pharmthera.2020.107630 (2021).
- 27 65 van der Meer, A. D., Poot, A. A., Feijen, J. & Vermes, I. Analyzing shear stress-induced  
28 alignment of actin filaments in endothelial cells with a microfluidic assay.  
29 *Biomicrofluidics* **4**, 11103, doi:10.1063/1.3366720 (2010).
- 30 66 Batchelor, R. *et al.* Two in One: Light as a Tool for 3D Printing and Erasing at the  
31 Microscale. *Adv Mater* **31**, e1904085, doi:10.1002/adma.201904085 (2019).

- 1 67 Schuster, B. *et al.* Automated microfluidic platform for dynamic and combinatorial  
2 drug screening of tumor organoids. *Nat Commun* **11**, 5271, doi:10.1038/s41467-020-  
3 19058-4 (2020).
- 4 68 Michas, C. *et al.* Engineering a living cardiac pump on a chip using high-precision  
5 fabrication. *Sci Adv* **8**, eabm3791, doi:10.1126/sciadv.abm3791 (2022).
- 6 69 Leung, C. M. *et al.* A guide to the organ-on-a-chip. *Nature Reviews Methods Primers*  
7 **2**, 33, doi:10.1038/s43586-022-00118-6 (2022).
- 8 70 Dominguez, G. A., Anderson, N. R. & Hammer, D. A. The direction of migration of T-  
9 lymphocytes under flow depends upon which adhesion receptors are engaged. *Integr*  
10 *Biol (Camb)* **7**, 345-355, doi:10.1039/c4ib00201f (2015).
- 11 71 Fuh, K. F., Shepherd, R. D., Withell, J. S., Kooistra, B. K. & Rinker, K. D. Fluid flow  
12 exposure promotes epithelial-to-mesenchymal transition and adhesion of breast cancer  
13 cells to endothelial cells. *Breast Cancer Res* **23**, 97, doi:10.1186/s13058-021-01473-0  
14 (2021).
- 15 72 Sahai, E. *et al.* A framework for advancing our understanding of cancer-associated  
16 fibroblasts. *Nat Rev Cancer* **20**, 174-186, doi:10.1038/s41568-019-0238-1 (2020).
- 17 73 Pakshir, P. *et al.* Dynamic fibroblast contractions attract remote macrophages in  
18 fibrillar collagen matrix. *Nat Commun* **10**, 1850, doi:10.1038/s41467-019-09709-6  
19 (2019).
- 20 74 Haase, R. *et al.* CLIJ: GPU-accelerated image processing for everyone. *Nat Methods*  
21 **17**, 5-6, doi:10.1038/s41592-019-0650-1 (2020).
- 22 75 Tinevez, J. Y. *et al.* TrackMate: An open and extensible platform for single-particle  
23 tracking. *Methods* **115**, 80-90, doi:10.1016/j.ymeth.2016.09.016 (2017).
- 24 76 Bredfeldt, J. S. *et al.* Computational segmentation of collagen fibers from second-  
25 harmonic generation images of breast cancer. *J Biomed Opt* **19**, 16007,  
26 doi:10.1117/1.JBO.19.1.016007 (2014).
- 27 77 Stirling, D. R. *et al.* CellProfiler 4: improvements in speed, utility and usability. *BMC*  
28 *Bioinformatics* **22**, 433, doi:10.1186/s12859-021-04344-9 (2021).
- 29  
30

1    **Author Contributions**

2    W.M.L. initiated, developed and supervised the project. Y.J.L. led the project, performed experimental  
3    work and carried out the analysis of the results. J.Z. prepared and performed cell experimental work.  
4    H.L. and T.X. assisted in lithography. H.L. assisted in image analysis and deconvolution. Y. L. built  
5    the AO system. Z. Z. advised on software development of phase imaging. S.M.H. and E.E.G. advised  
6    on platelet experiments and S.M.H. prepared GPVI Fabs. I.C. and D.N. carried out flow simulation.  
7    W.M.L. and Y.J.L. wrote the manuscript with input from all authors.

8

9    **Disclosures**

10   The adaptive optics technique used in this paper has been submitted for a provisional patent application,  
11   Application No. 2019904929.

12

13   **Funding**

14   Australian Research Council (DE160100843, DP190100039, DP200100364)

1 **Figure 1. Current approaches for fabricating microfluidic channels with 3D patterning. A)**  
2 Diagram of steps and time requirement to fabricate a circular microchannel with an irregular-shaped  
3 structure using (i) soft lithography, (ii) fused deposition modeling or (iii) *MILL*. The lithography  
4 resolutions and time incurred are indicated below each process. **B)** Brightfield image and 2-photon  
5 fluorescence image (inset) of herringbone structure in a square glass capillary tube.  
6

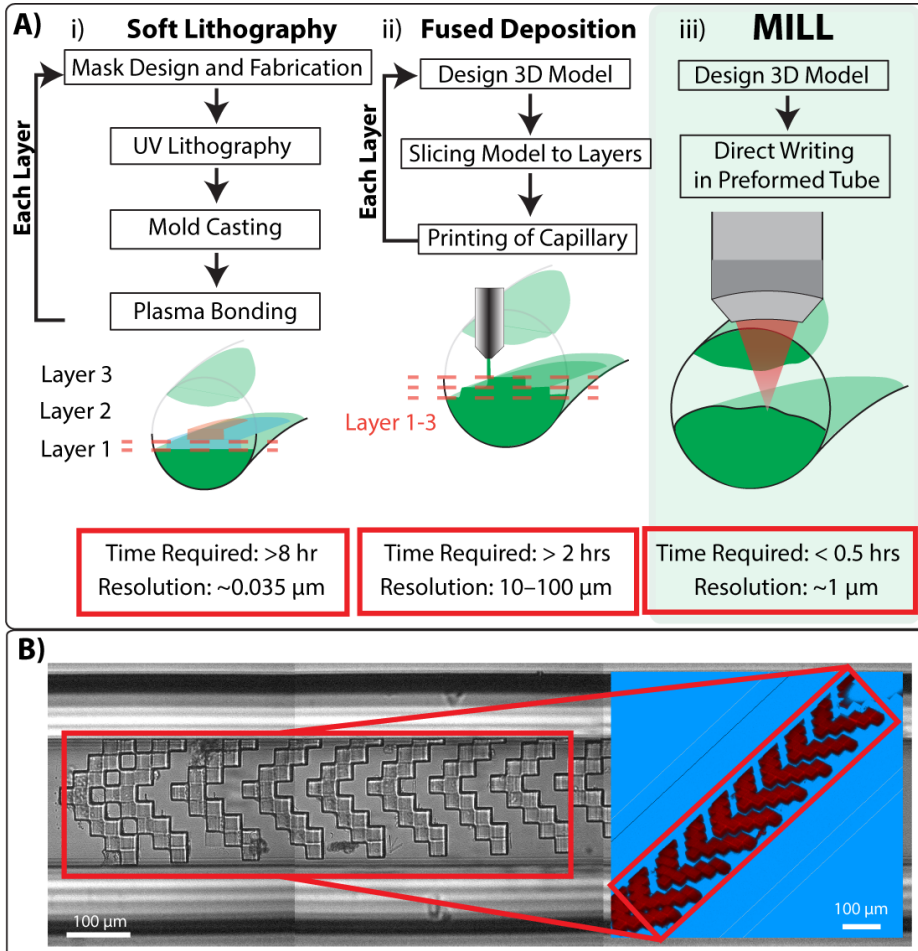

7  
8

1 **Figure 2. Fibroblast adhesion and proliferation under homogenous fluid shear stress: shape**  
 2 **change, mobility, and actin reorganization. A,** Experiment steps to measure cell response (shape  
 3 change and mobility) along different shear stress and adhesion ligand coatings. Cells (L929, fibroblasts)  
 4 are first seeded on glass surfaces (dish or capillary tube) that are precoated with collagen or poly-L-  
 5 Lysine (PLL). A range of homogeneous fluid shear stresses (0 to 3.5 dynes/cm<sup>2</sup>) were imposed over 12  
 6 hours period and cell motility monitored by microscopy. **B,** i) Cell adhesion and proliferation are each  
 7 measured based on cell ellipticity and motility, respectively, using automated cell tracking. ii) Results  
 8 of cell shape change (ellipticity) subjected to different shear stress (0-3.5 dynes/cm<sup>2</sup>) on collagen or  
 9 PLL-coated capillaries were tracked over the first 3 hours (n=3 cells). iii) Cell cluster motility at shear  
 10 stress 0.01, 0.9 and 1.7 dynes/cm<sup>2</sup>. **C** i) - vi) Time lapse imaging of L929 cells with quantitative phase  
 11 microscopy over the full 12 hours for selected field of view. Cell cluster motility in B) iii) was measured  
 12 after cell segmentation (yellow outline). **D** i) - vi) Confocal maximum intensity projections of actin  
 13 fiber (F-actin) in L929 cells after 12 hours at shear stress 0 and 0.9 dynes/cm<sup>2</sup> under PLL and collagen  
 14 coated glass surface. v) and vi) Segmentation and quantification of actin fiber orientation, alignment  
 15 along flow direction. vii) alignment of actin parallel to flow (n=4 cells). 0 means completely orthogonal  
 16 and unity means parallel to flow axis. Scale bars- C) 40  $\mu$ m and 15  $\mu$ m, D) 20  $\mu$ m and 5  $\mu$ m. Data are  
 17 the means and SD with D) vi) 2-way ANOVA analysis (\*\*P < 0.01; \*\*\*\*P < 0.001; ns, not significant)

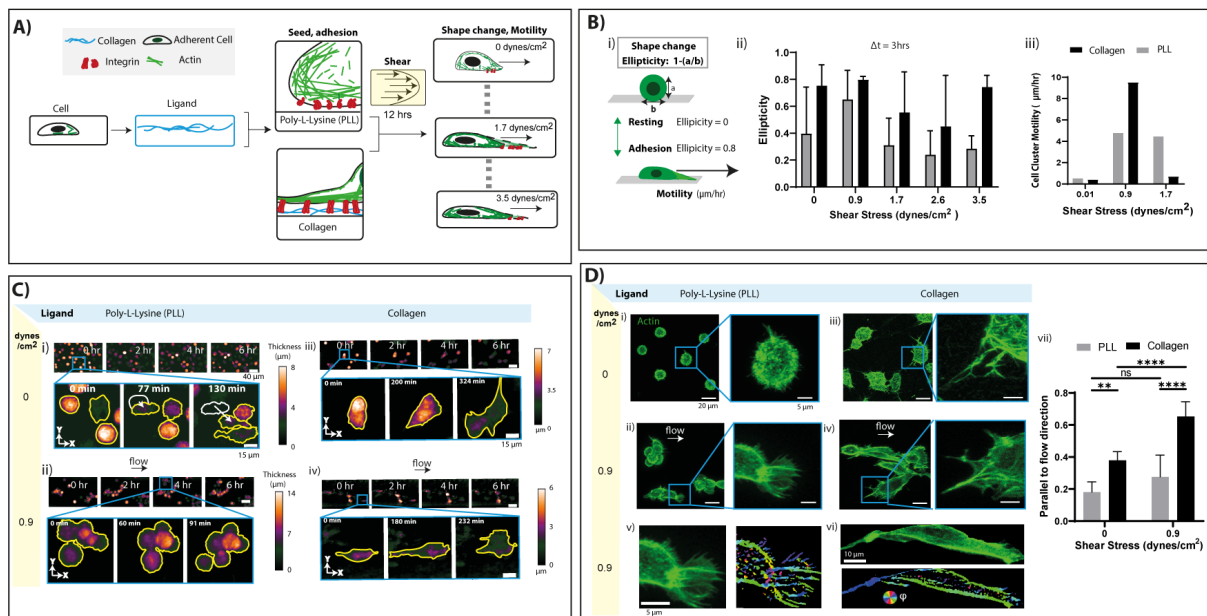

18

1 **Figure 3. Heterogenous Fluid Shear stimulates heterogenous cell adhesion, mobility and actin**  
 2 **cytoskeleton.** A, i) orthogonal plots of structures formed by MILL as scanned by confocal microscopy,  
 3 ii) homogenous and iii) heterogenous flow profile determined by PTV. (B, i) and ii) QPM images of  
 4 L929 fibroblasts after 1 hour of cell seeding, iii) and iv) after 12 hours of flow to v) determine how  
 5 heterogeneous shear stress controls cell motility. vi) Quantification of cell motility from time lapse  
 6 phase imaging (n=3). vii), viii), ix) 2-photon SHG and fluorescence imaging of fixed cells after 12 hours  
 7 of flow under laminar, homogenous flow rate. C) i) and ii) Shows regions with laminar and different  
 8 shear stress. iii-vi) confocal imaging of actin in L929 cells and segmentation of the cell to vii) identify  
 9 the proportion of actin at the cell periphery (n=6). Data are the means and SD with B) vi) unpaired t test  
 10 and C) vii) ordinary one-way ANOVA analysis (\*P<0.05; \*\*\*\*P<0.001; ns, not significant).

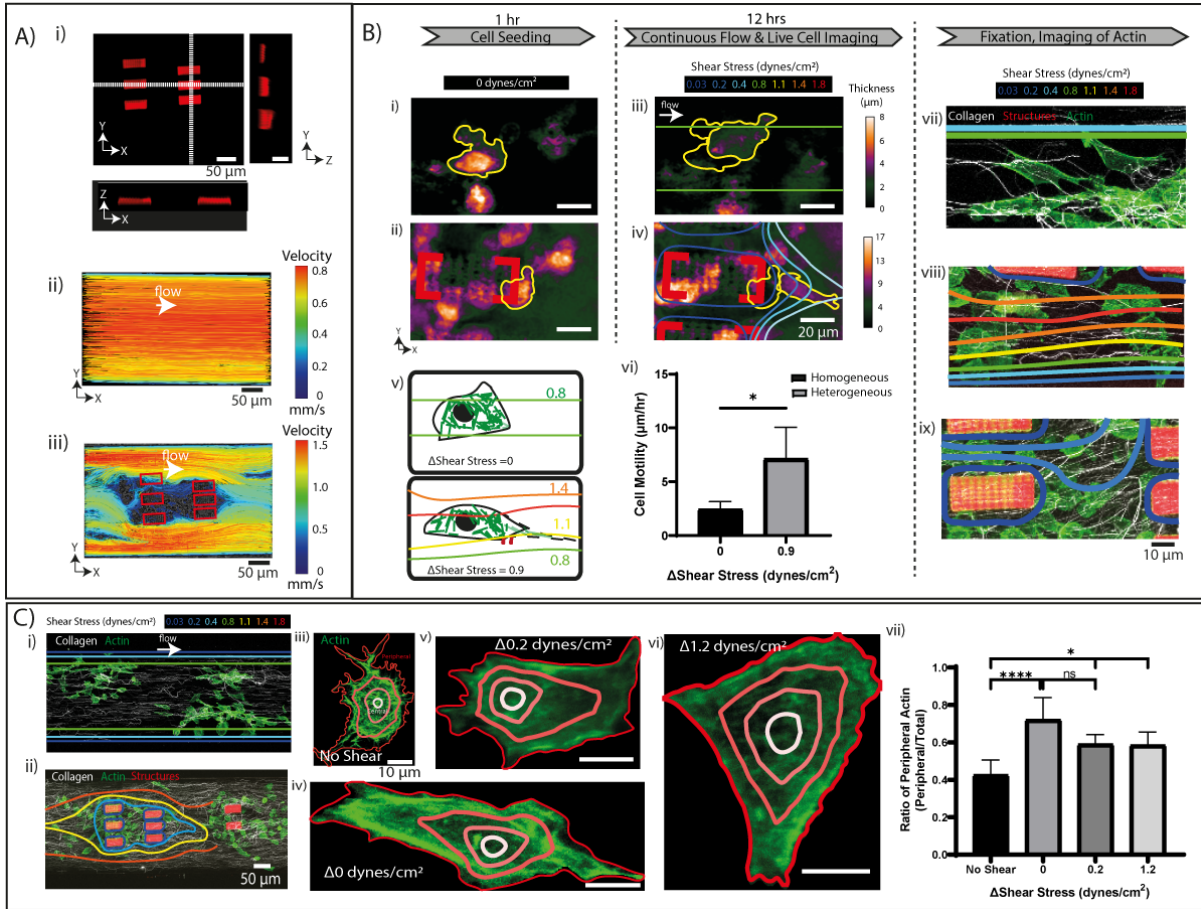

11

1 **Figure 4. Adaptive Optics Multiphoton Inner Laser Lithography for cylindrical tube.** **A,** Non-  
 2 symmetrical disruption of flow from lithography of asymmetrical structure within a circular capillary  
 3 with flow velocity determined by CFD simulation. **B,** i) Aberration imposed by cylindrical tube. ii)  
 4 Lithography structures subjected to aberrations. iii) Identifying aberration mask and iv) lithography  
 5 structure formed after AO correction and (v) width and (vi) thickness of structures formed with or  
 6 without AO MILL measured with QPM. Results are the mean and SD of n=5 structures. **C,** i) and ii)  
 7 Flow velocities across an empty and fabricated AO MILL structure determined experimentally with  
 8 PTV. **D,** Second harmonic imaging of collagen distribution across a tube under (i) laminar or (ii)  
 9 heterogeneous shear and (iii) fiber alignment measured after thresholding and segmentation. Data are  
 10 the means and SD with B) v) and vi) ordinary one-way ANOVA analysis (\*P < 0.05; \*\*P < 0.01; ns,  
 11 not significance).

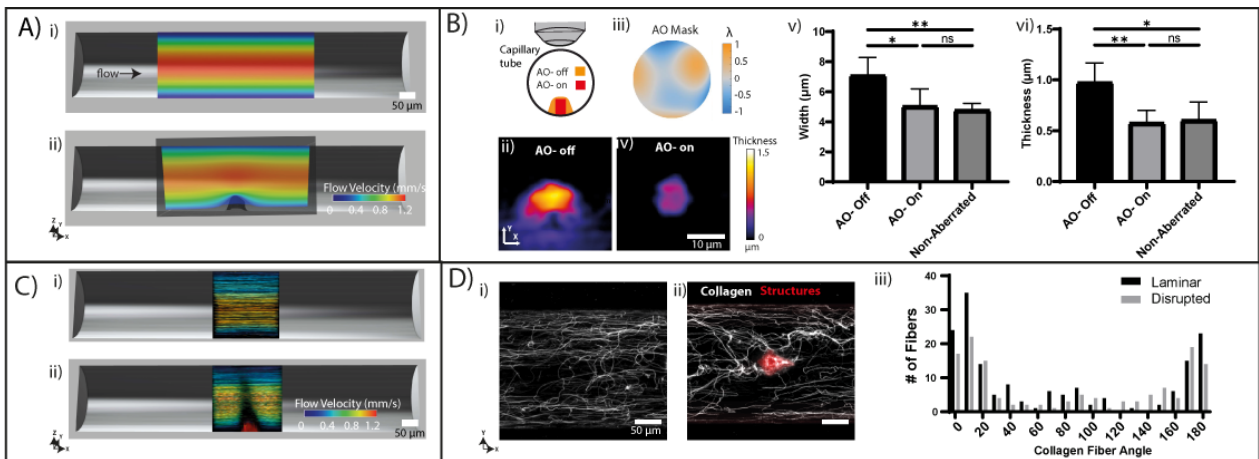

12  
 13  
 14



1 **Figure 5. Asymmetrical AO-MILL structure generated heterogenous FSS that increases platelet**  
2 **translocation. A, (i) SHG imaging of collagen distribution (white) (ii) flow velocity determined by**  
3 **PTV. (iii) XY slice of platelets adhering on the stenosis, iv) SHG imaging of collagen distribution**  
4 **(white) surrounding an AO-MILL structure (red). (v) flow velocity around AO-MILL structure**  
5 **determined by PTV. B tracked to measure platelet motility across the capillary. Arrows indicate**  
6 **direction of platelet translocation. Platelet motility quantified across the capillary in color code and fluid**  
7 **shear stress boundaries are demarcated. C, i) Volumetric render of platelet velocities across the stenotic**  
8 **capillary and ii) cross sectional zoomed in image adjacent to the AO MILL structure showing platelet**  
9 **movement (white arrow).**

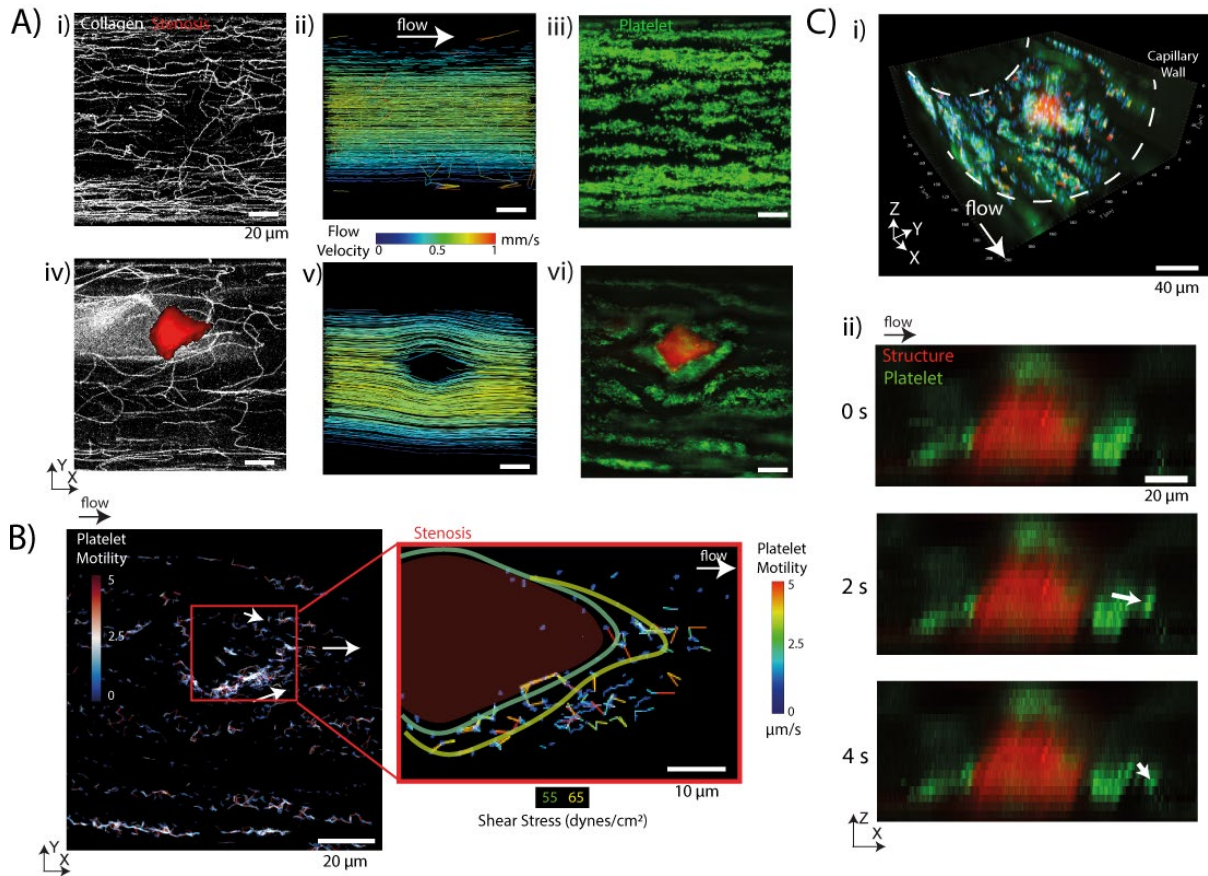

10  
11

1 **Figure 6. Effect of fluid shear stress increases thrombus formation.** A, (i) Shear disruption from an  
2 irregular AO MILL structure that generates (ii) a heterogeneous flow profile simulated by CFD and  
3 promotes (iii) thrombus formation. iv) simulation and (v) PTV after thrombus is formed. B QPM  
4 imaging of thrombi formed in a capillary (i) without and (ii) with the AO-MILL structure of formed  
5 thrombi upstream and downstream to the stenosis. iii), QOM images quantified across three region.  
6

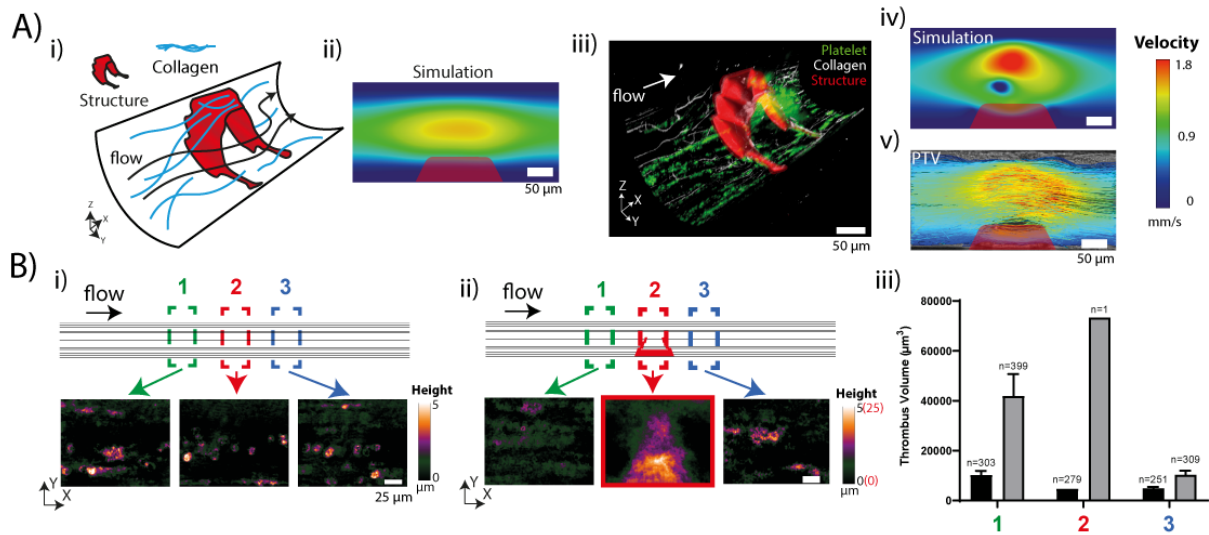

7  
8  
9

1 **Figure 7. Increasing FSS assay throughput with multiple MILL capillary chip.** A, Design  
2 of a reusable PDMS-based clamp consisting 4 capillary slots and an imaging window, which  
3 is adhered onto a glass slide. Inlets and outlets are connected to tubing using an optical UV  
4 glue for rapid sealing and structures formed in selected capillaries using MILL. B, The collagen  
5 coverage is characterized by SHG imaging prior to C. thrombus formation under flow in each  
6 capillary tube. D, Scatter plot of thrombi volume over area as measured by QPM with  
7 homogenous and heterogenous flow and with and without GPIV Fab treatment.

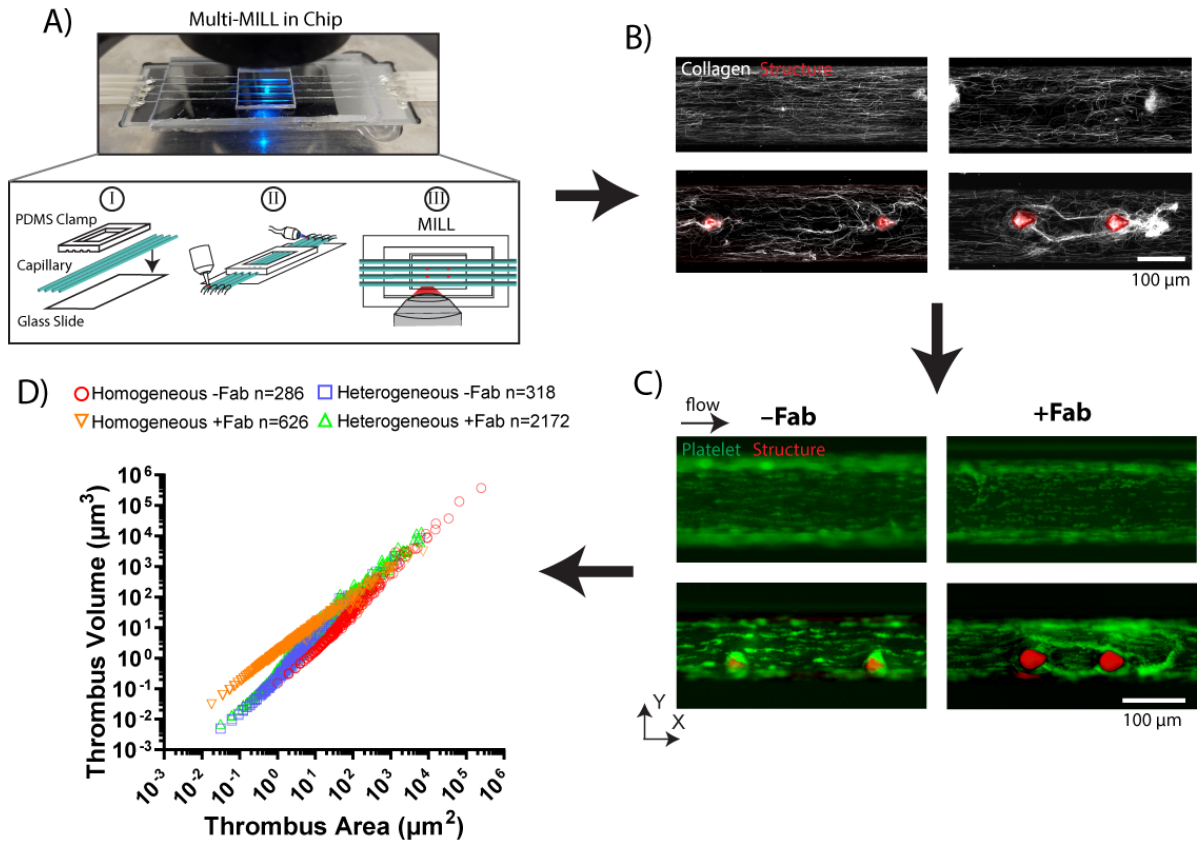

8  
9  
10

- 1 **Figure 8. Degrees of laminar flow: homogeneous or heterogeneous flow profiles.** Laminar
- 2 flow is represented in different shear regimes that are classified as homogeneous vs
- 3 heterogeneous shear distributions, which cells sense and respond to differently.

### Degrees of Laminar Flow

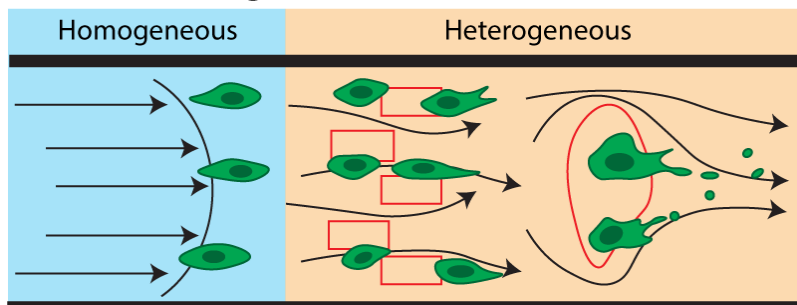

4

5
